# Supplementary material
Source: PubMed Central journal article supplement (PMC8863057)

## Supplementary Materials

### Genome-based characterization of a plasmid-associated micrococcin P1 biosynthetic gene cluster and virulence factors in *Mammaliicoccus sciuri* IMDO-S72

David Van der Veken<sup>1</sup>, Charlie Hollanders<sup>2</sup>, Marko Verce<sup>1</sup>, Chris Michiels<sup>3</sup>, Steven Ballet<sup>2</sup>, Stefan Weckx<sup>1</sup> and Frédéric Leroy<sup>1\*</sup>

<sup>1</sup>Research Group of Industrial Microbiology and Food Biotechnology (IMDO), Faculty of Sciences and Bioengineering Sciences, Vrije Universiteit Brussel, Brussels, Belgium

<sup>2</sup>Research Group of Organic Chemistry (ORGC), Faculty of Sciences and Bioengineering Sciences, Vrije Universiteit Brussel, Brussels, Belgium

<sup>3</sup>Laboratory of Food Microbiology and Leuven Food Science and Nutrition Research Centre (LForCe), KU Leuven, Leuven, Belgium

#### Content

1. Supplementary Methods (p. 2)
2. Supplementary Tables S1-S3 (pp. 3-12)
3. Supplementary Figures S1-S9 (pp. 13-32)

## SUPPLEMENTARY METHODS

### Growth experiments and kinetic modelling

The meat simulation medium (MSM) contained the following ingredients (expressed per L): 8.8 g Lab-Lemco (Oxoid), 11.0 g bacteriological peptone (Oxoid), 2.2 g yeast extract (Oxoid), 1 mL Tween 80 (Sigma), 0.038 g  $\text{MnSO}_4 \cdot 5\text{H}_2\text{O}$  (VWR International, Radnor, PA, USA), 40.0 g NaCl (VWR International), 2.96 g arginine (Oxoid), 13.0 g glucose (VWR International), 100 mg oleic acid (Merck), 50 mg palmitic acid (Merck), 50 mg linoleic acid (Merck) and 25 mg stearic acid (Merck). All compounds were dissolved in ultrapure water and sterilized *in situ* at 121°C for 20 min, except for glucose and fatty acids which were sterilized separately and then aseptically added to the bioreactor.

Inoculum build-up of *M. sciuri* IMDO-S72 was achieved through three subcultures. A single colony from MSA was transferred into 10 mL of BHI broth and incubated for 8 h at 30°C. From this first subculture, 1 mL was transferred to 100 mL of MSM (pH 6.5) and incubated for 24 h at 30°C. The third subculture was obtained by transferring 1 mL of the second subculture into 100 mL of MSM (pH 6.5) followed by an incubation of 16 h at 30°C and was used as final inoculum. The MSM used in the inoculum build-up was free of arginine and fatty acids.

Experiments were performed for 46 h at a constant pH of 5.7 through automated addition of 1 M of NaOH and HCl solutions, and at a temperature of 25°C. Aerobic conditions were assumed by dispersing an airflow of 2.0 L  $\text{min}^{-1}$  through the cultivation medium at an agitation rate of 200 rpm. Microaerobic conditions were achieved without airflow and agitation rate of 200 rpm. To avoid excessive foam formation, 10 mL of Antifoam 204 (Merck) was added to aerobic fermentations. Samples were taken at regular time intervals, after which the sampling valve was steam-sterilized during 15 min. For microbial enumeration, appropriate dilutions were made in PBS and plated on MSA followed by a 24 h incubation at 30°C. Supernatant was obtained by immediate centrifugation (4696  $\times g$  for 20 min at 4°C) of the culture liquid after sampling and stored at -20°C until further analysis.

Semi-quantitative determination of the antibacterial activity was performed using an agar spot test against *Staphylococcus carnosus* IMDO-S5 as susceptible indicator strain. For each time point, a two-fold dilution series of cell-free supernatant in PBS was made after heat treatment for 15 min at 80°C. Ten  $\mu\text{L}$  of each dilution was spotted onto BHI agar and overlaid with BHI soft agar (0.7%, w/v) inoculated with 100  $\mu\text{L}$  of an overnight grown indicator strain, followed by an incubation of 15 h at 30°C.

## SUPPLEMENTARY TABLES S1-S3

**Supplementary Table S1.** Sequence alignment (blastp) output for the functional comparison of the thiopeptide gene clusters of *Mc. caseolyticus* 115, *M. sciuri* IMDO-S72 and *B. cereus* ATCC 14579 as depicted in Figure 1.

| Locus tags of pIMDO-S72-2 | <i>Macrococcus caseolyticus</i> 115 |                                     | <i>Bacillus cereus</i> ATCC 14579 |                                     | Predicted enzyme function                                                                                                                           | Functional classification  | Color  |
|---------------------------|-------------------------------------|-------------------------------------|-----------------------------------|-------------------------------------|-----------------------------------------------------------------------------------------------------------------------------------------------------|----------------------------|--------|
|                           | Protein homolog                     | qcovs/evalue/bitsscore/pident/ppos* | Protein homolog                   | qcovs/evalue/bitsscore/pident/ppos* |                                                                                                                                                     |                            |        |
| SSCS72_02882              | -                                   | -                                   | BC_RS25430                        | 13/1.3/18.5/31.25/75                | <i>M. sciuri</i> : replication initiator protein<br><i>Mc. caseolyticus</i> : -<br><i>B. cereus</i> : -                                             | Plasmid replication        | Orange |
| SSCS72_02883              | -                                   | -                                   | -                                 | -                                   | <i>M. sciuri</i> : -<br><i>Mc. caseolyticus</i> : -<br><i>B. cereus</i> : -                                                                         | -                          | -      |
| SSCS72_02884              | -                                   | -                                   | -                                 | -                                   | <i>M. sciuri</i> : transposase<br><i>Mc. caseolyticus</i> : -<br><i>B. cereus</i> : -                                                               | DNA recombination          | Rose   |
| SSCS72_02885              | AIU53931.1                          | 26/1.6/19.2/31.818/45.45            | -                                 | -                                   | <i>M. sciuri</i> : -<br><i>Mc. caseolyticus</i> : ATPase<br><i>B. cereus</i> : -                                                                    | -                          | -      |
| SSCS72_02886              | AIU53928.1                          | 19/1.5/18.9/36.111/44.44            | BC_RS25370                        | 11/0.18/23.1/41.176/82.35           | <i>M. sciuri</i> : invertase<br><i>Mc. caseolyticus</i> : integrase<br><i>B. cereus</i> : -                                                         | DNA recombination          | Rose   |
| SSCS72_02887              | AIU53929.1                          | 9/0.98/20.0/32.143/53.57            | -                                 | -                                   | <i>M. sciuri</i> : transposase<br><i>Mc. caseolyticus</i> : -<br><i>B. cereus</i> : -                                                               | DNA recombination          | Rose   |
| SSCS72_02888              | AIU53951.1<br>( <i>tclU</i> )       | 70/3.35E-10/44.3/32.5/53.75         | BC_RS25310<br>( <i>tclU</i> )     | 57/4.86E-10/44.3/36.842/61.84       | <i>M. sciuri</i> : transcriptional regulator<br><i>Mc. caseolyticus</i> : transcriptional regulator<br><i>B. cereus</i> : transcriptional regulator | Transcriptional regulation | Brown  |
| SSCS72_02889              | AIU53950.1<br>( <i>tclP</i> )       | 100/7.49E-83/238/55.932/69.49       | BC_RS25335<br>( <i>tclP</i> )     | 73/1.72E-58/177/51.613/68.28        | <i>M. sciuri</i> : dehydrogenase<br><i>Mc. caseolyticus</i> : decarboxylase<br><i>B. cereus</i> : dehydrogenase                                     | Dehydrogenation            | Green  |
| SSCS72_02890              | AIU53949.1<br>( <i>tclN</i> )       | 98/1.10E-125/363/44.045/63.82       | BC_RS25345<br>( <i>tclN</i> )     | 97/5.32E-17/72.8/24.225/41.09       | <i>M. sciuri</i> : -<br><i>Mc. caseolyticus</i> : cyclodehydratase<br><i>B. cereus</i> : dehydrogenase                                              | Heterocyclization          | Blue   |
| SSCS72_02891              | AIU53948.1<br>( <i>tclM</i> )       | 92/1.36E-62/189/43.725/63.16        | BC_RS25350<br>( <i>tclM</i> )     | 71/9.69E-25/91.7/29.31/48.71        | <i>M. sciuri</i> : -<br><i>Mc. caseolyticus</i> : -<br><i>B. cereus</i> : -                                                                         | Macrocyclization           | Purple |
| SSCS72_02892              | AIU53947.1<br>( <i>tclL</i> )       | 98/1.55E-67/201/42.857/63.53        | BC_RS25355<br>( <i>tclL</i> )     | 94/1.16E-32/112/30.263/48.03        | <i>M. sciuri</i> : dehydratase<br><i>Mc. caseolyticus</i> : dehydratase<br><i>B. cereus</i> : dehydrogenase                                         | Dehydration                | Red    |
| SSCS72_02893              | AIU53946.1                          | 99/0/564/41.065/62.01               | BC_RS25360                        | 89/4.98E-58/203/26.289/47.04        | <i>M. sciuri</i> : dehydratase                                                                                                                      | Dehydration                | Red    |

Supplementary Materials

|              |                               |                               |                                                                                                                                  |                                                                                                      |                                                                                                                                                        |                   |        |
|--------------|-------------------------------|-------------------------------|----------------------------------------------------------------------------------------------------------------------------------|------------------------------------------------------------------------------------------------------|--------------------------------------------------------------------------------------------------------------------------------------------------------|-------------------|--------|
|              | ( <i>tclK</i> )               |                               | ( <i>tclK</i> )                                                                                                                  |                                                                                                      | <i>Mc. caseolyticus</i> : dehydratase<br><i>B. cereus</i> : dehydratase                                                                                |                   |        |
| SSCS72_02894 | AIU53945.1<br>( <i>tclJ</i> ) | 99/1.81E-170/486/47.602/65.72 | BC_RS25365<br>( <i>tclJ</i> )                                                                                                    | 76/2.30E-82/261/35.838/50.67                                                                         | <i>M. sciuri</i> : cyclodehydratase<br><i>Mc. caseolyticus</i> : cyclodehydratase<br><i>B. cereus</i> : cyclodehydratase                               | Heterocyclization | Blue   |
| SSCS72_02895 | AIU53944.1<br>( <i>tclI</i> ) | 98/4.57E-33/111/36.111/54.76  | - ( <i>tclI</i> gene of<br>BC has best hit<br>with<br>SSCS72_02886)                                                              | -                                                                                                    | <i>M. sciuri</i> : -<br><i>Mc. caseolyticus</i> : thiopeptide<br>biosynthesis protein<br><i>B. cereus</i> : -                                          | Heterocyclization | Blue   |
| SSCS72_02896 | AIU53943.1<br>( <i>tclQ</i> ) | 100/7.55E-76/213/72.34/87.94  | BC_RS25315<br>( <i>tclQ</i> )<br>BC_RS25330<br>( <i>tclT</i> )                                                                   | 99/6.00E-60/172/56.429/76.43<br>99/6.00E-60/172/56.429/76.43                                         | <i>M. sciuri</i> : 50S ribosomal protein L11<br><i>Mc. caseolyticus</i> : 50S ribosomal<br>protein L11<br><i>B. cereus</i> : 50S ribosomal protein L11 | Immunity          | Yellow |
| SSCS72_02897 | AIU53940.1                    | 92/4.30E-13/54.3/29.221/48.7  | BC_RS25435                                                                                                                       | 13/0.079/24.3/27.143/42.86                                                                           | <i>M. sciuri</i> : -<br><i>Mc. caseolyticus</i> : -<br><i>B. cereus</i> : thiol cytolysin                                                              | Unknown           | Gray   |
| SSCS72_02898 | AIU53941.1<br>( <i>tclS</i> ) | 100/8.83E-37/119/39.207/55.51 | BC_RS25320<br>( <i>tclS</i> )                                                                                                    | 53/4.72E-14/59.3/31.746/50                                                                           | <i>M. sciuri</i> : dehydrogenase<br><i>Mc. caseolyticus</i> : decarboxylase<br><i>B. cereus</i> : dehydrogenase                                        | Dehydrogenation   | Green  |
| SSCS72_02899 | AIU53942.1<br>( <i>tclE</i> ) | 86/0.024/20.4/66.667/83.33    | BC_RS25375<br>( <i>tclE</i> )<br>BC_RS25380<br>( <i>tclF</i> )<br>BC_RS25385<br>( <i>tclG</i> )<br>BC_RS25390<br>( <i>tclH</i> ) | 13/9/14.2/57.143/85.71<br>13/9/14.2/57.143/85.71<br>13/9/14.2/57.143/85.71<br>13/9/14.2/57.143/85.71 | <i>M. sciuri</i> : precursor peptide<br><i>Mc. caseolyticus</i> : precursor peptide<br><i>B. cereus</i> : precursor peptide                            | Precursor peptide | Black  |
| SSCS72_02900 | -                             | -                             | -                                                                                                                                | -                                                                                                    | <i>M. sciuri</i> : -<br><i>Mc. caseolyticus</i> : -<br><i>B. cereus</i> : -                                                                            | -                 | -      |
| SSCS72_02901 | -                             | -                             | -                                                                                                                                | -                                                                                                    | <i>M. sciuri</i> : membrane associated<br><i>Mc. caseolyticus</i> : -<br><i>B. cereus</i> : -                                                          | -                 | -      |
| SSCS72_02902 | AIU53934.1                    | 42/0.027/21.6/40.741/66.67    | -                                                                                                                                | -                                                                                                    | <i>M. sciuri</i> : membrane associated<br><i>Mc. caseolyticus</i> : -<br><i>B. cereus</i> : -                                                          | -                 | -      |
| SSCS72_02903 | -                             | -                             | BC_RS25440                                                                                                                       | 19/0.11/22.7/32.653/46.94                                                                            | <i>M. sciuri</i> : membrane associated<br><i>Mc. caseolyticus</i> : -<br><i>B. cereus</i> : ABC transporter                                            | -                 | -      |
| SSCS72_02904 | -                             | -                             | -                                                                                                                                | -                                                                                                    | <i>M. sciuri</i> : membrane associated<br><i>Mc. caseolyticus</i> : -<br><i>B. cereus</i> : -                                                          | -                 | -      |
| SSCS72_02905 | -                             | -                             | -                                                                                                                                | -                                                                                                    | <i>M. sciuri</i> : -<br><i>Mc. caseolyticus</i> : -<br><i>B. cereus</i> : -                                                                            | -                 | -      |

Supplementary Materials

|              |            |                             |            |                    |                                                                                                                                               |                     |        |
|--------------|------------|-----------------------------|------------|--------------------|-----------------------------------------------------------------------------------------------------------------------------------------------|---------------------|--------|
| SSCS72_02906 | -          | -                           | -          | -                  | <i>M. sciuri</i> : -<br><i>Mc. caseolyticus</i> : -<br><i>B. cereus</i> : -                                                                   | -                   | -      |
| SSCS72_02907 | AIU53937.1 | 97/3.30E-37/124/26.563/54.3 | BC_RS25295 | 2/2.8/19.2/62.5/75 | <i>M. sciuri</i> : partitioning protein<br><i>Mc. caseolyticus</i> : plasmid-replication associated protein<br><i>B. cereus</i> : transporter | Plasmid replication | Orange |
| SSCS72_02908 | -          | -                           | -          | -                  | <i>M. sciuri</i> : membrane associated<br><i>Mc. caseolyticus</i> : -<br><i>B. cereus</i> : -                                                 | -                   | -      |

\*qcovs, Query coverage per subject; evalue, Expect value; bitscore, Bit score; pident, Percentage of identical matches; ppos, Percentage of positive-scoring matches.

Supplementary Materials

**Supplementary Table S2.** Dataset of the comparative pathogenomic output generated by VFAnalyzer and used for plotting of the heatmap represented in Figure 5. Numbers 0 and 1 represent ‘no detection of a homologue gene’ and ‘detection of at least one homologue gene’, respectively. Gene\_ID represents the *M. sciuri* IMDO-S72 locus tags that were detected as homologues of known virulence factors. The data in the column of *M. sciuri* IMDO-S72 is the result of a detection by either VFAnalyzer and/or manual sequence alignment (blastp) as indicated by the last three columns (output for the other strains is solely based on VFAnalyzer). Reference strains whose preanalyzed genomes were used by VFAnalyzer to construct orthologous groups are shaded in orange, while strains whose genomes were queried are shaded in blue.

| Virulence_Class | Virulence_Factors                                     | Related_Genes  | Gene_ID                                                              | <i>M. sciuri</i> IMDO-S72 | <i>S. aureus</i> subsp. <i>aureus</i> JH1 | <i>S. aureus</i> subsp. <i>aureus</i> MRSA252 | <i>S. aureus</i> subsp. <i>aureus</i> MW2 | <i>S. aureus</i> subsp. <i>aureus</i> USA300_TCH1516 | <i>S. epidermidis</i> RP62A | <i>S. haemolyticus</i> JCSC1435 | <i>S. saprophyticus</i> subsp. <i>saprophyticus</i> ATCC 15305 | <i>S. carnosus</i> TM300 | <i>S. xyloso</i> HKUOPL8 | <i>S. equorum</i> KS1039 | VFAnalyzer | BLASTP | Detected by both methods |
|-----------------|-------------------------------------------------------|----------------|----------------------------------------------------------------------|---------------------------|-------------------------------------------|-----------------------------------------------|-------------------------------------------|------------------------------------------------------|-----------------------------|---------------------------------|----------------------------------------------------------------|--------------------------|--------------------------|--------------------------|------------|--------|--------------------------|
| Adherence       | Autolysin                                             | <i>atl</i>     | SSCS72_02005, SSCS72_02030, SSCS72_01175, SSCS72_00583, SSCS72_02003 | 1                         | 1                                         | 1                                             | 1                                         | 1                                                    | 1                           | 1                               | 1                                                              | 0                        | 1                        | 1                        | 0          | 1      | 0                        |
| Adherence       | Cell wall associated fibronectin binding protein      | <i>ebh</i>     | SSCS72_01534                                                         | 1                         | 1                                         | 1                                             | 1                                         | 1                                                    | 1                           | 0                               | 0                                                              | 0                        | 0                        | 0                        | 0          | 1      | 0                        |
| Adherence       | Clumping factor A                                     | <i>clfA</i>    |                                                                      | 0                         | 1                                         | 1                                             | 1                                         | 1                                                    | 0                           | 0                               | 0                                                              | 0                        | 0                        | 0                        | 0          | 0      | 0                        |
| Adherence       | Clumping factor B                                     | <i>clfB</i>    | SSCS72_00342                                                         | 1                         | 1                                         | 1                                             | 1                                         | 1                                                    | 0                           | 0                               | 0                                                              | 0                        | 0                        | 0                        | 1          | 0      | 0                        |
| Adherence       | Collagen adhesion                                     | <i>cna</i>     |                                                                      | 0                         | 0                                         | 1                                             | 1                                         | 0                                                    | 0                           | 0                               | 0                                                              | 0                        | 0                        | 0                        | 0          | 0      | 0                        |
| Adherence       | Elastin binding protein                               | <i>ebp</i>     | SSCS72_01488                                                         | 1                         | 1                                         | 1                                             | 1                                         | 1                                                    | 1                           | 1                               | 1                                                              | 0                        | 1                        | 1                        | 0          | 1      | 0                        |
| Adherence       | Extracellular adherence protein/MHC analogous protein | <i>eap/map</i> |                                                                      | 0                         | 1                                         | 1                                             | 1                                         | 1                                                    | 0                           | 0                               | 0                                                              | 0                        | 0                        | 0                        | 0          | 0      | 0                        |
| Adherence       | Fibrinogen binding protein                            | <i>efb</i>     |                                                                      | 0                         | 1                                         | 1                                             | 1                                         | 1                                                    | 0                           | 0                               | 0                                                              | 0                        | 0                        | 0                        | 0          | 0      | 0                        |
| Adherence       | Fibronectin binding proteins                          | <i>fnbA</i>    |                                                                      | 0                         | 1                                         | 1                                             | 1                                         | 1                                                    | 0                           | 0                               | 0                                                              | 0                        | 1                        | 0                        | 0          | 0      | 0                        |
| Adherence       | Fibronectin binding proteins                          | <i>fnbB</i>    |                                                                      | 0                         | 1                                         | 0                                             | 1                                         | 1                                                    | 0                           | 0                               | 0                                                              | 0                        | 0                        | 0                        | 0          | 0      | 0                        |

## Supplementary Materials

|                  |                                          |             |                                                |   |   |   |   |   |   |   |   |   |   |   |   |   |   |
|------------------|------------------------------------------|-------------|------------------------------------------------|---|---|---|---|---|---|---|---|---|---|---|---|---|---|
| <b>Adherence</b> | Intercellular adhesion                   | <i>icaA</i> | SSCS72_02865                                   | 1 | 1 | 1 | 1 | 1 | 1 | 0 | 0 | 0 | 0 | 0 | 1 | 1 | 1 |
| <b>Adherence</b> | Intercellular adhesion                   | <i>icaB</i> | SSCS72_02863                                   | 1 | 1 | 1 | 1 | 1 | 1 | 0 | 0 | 0 | 1 | 0 | 1 | 1 | 1 |
| <b>Adherence</b> | Intercellular adhesion                   | <i>icaC</i> | SSCS72_02862,<br>SSCS72_00185,<br>SSCS72_01996 | 1 | 1 | 1 | 1 | 1 | 1 | 0 | 0 | 0 | 1 | 0 | 1 | 1 | 1 |
| <b>Adherence</b> | Intercellular adhesion                   | <i>icaD</i> | SSCS72_02864                                   | 1 | 1 | 1 | 1 | 1 | 1 | 0 | 0 | 0 | 0 | 0 | 1 | 1 | 1 |
| <b>Adherence</b> | Intercellular adhesion                   | <i>icaR</i> | SSCS72_02866,<br>SSCS72_00184                  | 1 | 1 | 1 | 1 | 1 | 1 | 0 | 0 | 0 | 1 | 0 | 1 | 1 | 1 |
| <b>Adherence</b> | Ser-Asp rich fibrinogen-binding proteins | <i>sdrC</i> | SSCS72_00382                                   | 1 | 1 | 1 | 1 | 1 | 0 | 0 | 0 | 0 | 0 | 0 | 1 | 1 | 1 |
| <b>Adherence</b> | Ser-Asp rich fibrinogen-binding proteins | <i>sdrD</i> |                                                | 0 | 1 | 0 | 1 | 1 | 0 | 0 | 0 | 0 | 0 | 0 | 0 | 0 | 0 |
| <b>Adherence</b> | Ser-Asp rich fibrinogen-binding proteins | <i>sdrE</i> |                                                | 0 | 1 | 1 | 1 | 1 | 0 | 0 | 0 | 0 | 0 | 1 | 0 | 0 | 0 |
| <b>Adherence</b> | Ser-Asp rich fibrinogen-binding proteins | <i>sdrF</i> |                                                | 0 | 0 | 0 | 0 | 0 | 1 | 0 | 0 | 0 | 0 | 0 | 0 | 0 | 0 |
| <b>Adherence</b> | Ser-Asp rich fibrinogen-binding proteins | <i>sdrG</i> |                                                | 0 | 0 | 0 | 0 | 0 | 1 | 0 | 0 | 0 | 0 | 0 | 0 | 0 | 0 |
| <b>Adherence</b> | Ser-Asp rich fibrinogen-binding proteins | <i>sdrH</i> |                                                | 0 | 0 | 0 | 0 | 0 | 1 | 0 | 0 | 0 | 0 | 0 | 0 | 0 | 0 |
| <b>Adherence</b> | Staphylococcal protein A                 | <i>spa</i>  |                                                | 0 | 1 | 1 | 1 | 1 | 0 | 0 | 0 | 0 | 0 | 0 | 0 | 0 | 0 |
| <b>Enzyme</b>    | Cysteine protease                        | <i>sspB</i> |                                                | 0 | 1 | 1 | 1 | 1 | 1 | 0 | 0 | 0 | 0 | 0 | 0 | 0 | 0 |
| <b>Enzyme</b>    | Cysteine protease                        | <i>sspC</i> |                                                | 0 | 1 | 1 | 1 | 1 | 0 | 0 | 0 | 0 | 0 | 0 | 0 | 0 | 0 |
| <b>Enzyme</b>    | Hyaluronate lyase                        | <i>hysA</i> |                                                | 0 | 1 | 1 | 1 | 1 | 0 | 0 | 0 | 0 | 0 | 0 | 0 | 0 | 0 |
| <b>Enzyme</b>    | Lipase                                   | <i>geh</i>  |                                                | 0 | 1 | 1 | 1 | 1 | 1 | 0 | 1 | 1 | 1 | 0 | 0 | 0 | 0 |
| <b>Enzyme</b>    | Lipase                                   | <i>lip</i>  |                                                | 0 | 1 | 1 | 1 | 1 | 1 | 1 | 1 | 1 | 1 | 0 | 0 | 0 | 0 |
| <b>Enzyme</b>    | Serine V8 protease                       | <i>sspA</i> | SSCS72_01332,<br>SSCS72_02553                  | 1 | 1 | 1 | 1 | 1 | 1 | 0 | 1 | 0 | 1 | 1 | 1 | 1 | 1 |
| <b>Enzyme</b>    | Serine protease                          | <i>spA</i>  |                                                | 0 | 1 | 0 | 1 | 1 | 0 | 0 | 0 | 0 | 0 | 0 | 0 | 0 | 0 |
| <b>Enzyme</b>    | Serine protease                          | <i>spB</i>  |                                                | 0 | 1 | 0 | 1 | 1 | 0 | 0 | 0 | 0 | 0 | 0 | 0 | 0 | 0 |

## Supplementary Materials

|                         |                           |              |                                                                                  |   |   |   |   |   |   |   |   |   |   |   |   |   |   |   |
|-------------------------|---------------------------|--------------|----------------------------------------------------------------------------------|---|---|---|---|---|---|---|---|---|---|---|---|---|---|---|
| <b>Enzyme</b>           | Serine protease           | <i>spIC</i>  |                                                                                  | 0 | 1 | 1 | 1 | 1 | 0 | 0 | 0 | 0 | 0 | 0 | 0 | 0 | 0 |   |
| <b>Enzyme</b>           | Serine protease           | <i>spID</i>  |                                                                                  | 0 | 1 | 1 | 0 | 1 | 0 | 0 | 0 | 0 | 0 | 0 | 0 | 0 | 0 |   |
| <b>Enzyme</b>           | Serine protease           | <i>spIE</i>  |                                                                                  | 0 | 0 | 1 | 0 | 1 | 0 | 0 | 0 | 0 | 0 | 0 | 0 | 0 | 0 |   |
| <b>Enzyme</b>           | Serine protease           | <i>spIF</i>  |                                                                                  | 0 | 0 | 1 | 1 | 1 | 0 | 0 | 0 | 0 | 0 | 0 | 0 | 0 | 0 |   |
| <b>Enzyme</b>           | Staphylocoagulase         | <i>coa</i>   |                                                                                  | 0 | 1 | 1 | 1 | 1 | 0 | 0 | 0 | 0 | 0 | 0 | 0 | 0 | 0 |   |
| <b>Enzyme</b>           | Staphylokinase            | <i>sak</i>   |                                                                                  | 0 | 1 | 1 | 1 | 1 | 0 | 0 | 0 | 0 | 0 | 0 | 0 | 0 | 0 |   |
| <b>Enzyme</b>           | Thermonuclease            | <i>nuc</i>   | SSCS72_02216                                                                     | 1 | 1 | 1 | 1 | 1 | 1 | 1 | 1 | 1 | 1 | 1 | 1 | 0 | 1 | 0 |
| <b>Immune evasion</b>   | AdsA                      | <i>adsA</i>  |                                                                                  | 0 | 1 | 1 | 1 | 1 | 0 | 0 | 0 | 1 | 0 | 0 | 0 | 0 | 0 | 0 |
| <b>Immune evasion</b>   | CHIPS                     | <i>chp</i>   |                                                                                  | 0 | 1 | 1 | 0 | 1 | 0 | 0 | 0 | 0 | 0 | 0 | 0 | 0 | 0 | 0 |
| <b>Immune evasion</b>   | Capsule                   | Undetermined | SSCS72_00443,<br>SSCS72_00779,<br>SSCS72_01982,<br>SSCS72_00350,<br>SSCS72_00562 | 1 | 1 | 1 | 1 | 1 | 0 | 1 | 1 | 1 | 1 | 1 | 1 | 1 | 1 | 1 |
| <b>Immune evasion</b>   | SCIN                      | <i>scn</i>   |                                                                                  | 0 | 1 | 1 | 1 | 1 | 0 | 0 | 0 | 0 | 0 | 0 | 0 | 0 | 0 | 0 |
| <b>Immune evasion</b>   | Sbi                       | <i>sbi</i>   |                                                                                  | 0 | 1 | 1 | 1 | 1 | 0 | 0 | 0 | 0 | 0 | 0 | 0 | 0 | 0 | 0 |
| <b>Secretion system</b> | Type VII secretion system | <i>esaA</i>  |                                                                                  | 0 | 1 | 1 | 1 | 1 | 0 | 0 | 0 | 0 | 0 | 0 | 0 | 0 | 0 | 0 |
| <b>Secretion system</b> | Type VII secretion system | <i>esaB</i>  |                                                                                  | 0 | 1 | 1 | 1 | 1 | 0 | 0 | 0 | 0 | 0 | 0 | 0 | 0 | 0 | 0 |
| <b>Secretion system</b> | Type VII secretion system | <i>esaD</i>  |                                                                                  | 0 | 1 | 0 | 1 | 1 | 0 | 0 | 0 | 0 | 0 | 0 | 0 | 0 | 0 | 0 |
| <b>Secretion system</b> | Type VII secretion system | <i>esaE</i>  |                                                                                  | 0 | 1 | 0 | 1 | 1 | 0 | 0 | 0 | 0 | 0 | 0 | 0 | 0 | 0 | 0 |
| <b>Secretion system</b> | Type VII secretion system | <i>esaG</i>  |                                                                                  | 0 | 1 | 1 | 1 | 1 | 0 | 0 | 0 | 0 | 0 | 0 | 0 | 0 | 0 | 0 |
| <b>Secretion system</b> | Type VII secretion system | <i>essA</i>  |                                                                                  | 0 | 1 | 1 | 1 | 1 | 0 | 0 | 0 | 0 | 0 | 0 | 0 | 0 | 0 | 0 |
| <b>Secretion system</b> | Type VII secretion system | <i>essB</i>  |                                                                                  | 0 | 1 | 1 | 1 | 1 | 0 | 0 | 0 | 0 | 0 | 0 | 0 | 0 | 0 | 0 |
| <b>Secretion system</b> | Type VII secretion system | <i>essC</i>  |                                                                                  | 0 | 1 | 1 | 1 | 1 | 0 | 0 | 0 | 0 | 0 | 0 | 0 | 0 | 0 | 0 |
| <b>Secretion system</b> | Type VII secretion system | <i>esxA</i>  |                                                                                  | 0 | 1 | 1 | 1 | 1 | 0 | 0 | 0 | 0 | 0 | 0 | 0 | 0 | 0 | 0 |
| <b>Secretion system</b> | Type VII secretion system | <i>esxB</i>  |                                                                                  | 0 | 1 | 0 | 1 | 1 | 0 | 0 | 0 | 0 | 0 | 0 | 0 | 0 | 0 | 0 |



## Supplementary Materials

|                         |                           |                |  |  |   |   |   |   |   |   |   |   |   |   |   |   |   |   |
|-------------------------|---------------------------|----------------|--|--|---|---|---|---|---|---|---|---|---|---|---|---|---|---|
| <b>Secretion system</b> | Type VII secretion system | <i>esxC</i>    |  |  | 0 | 1 | 0 | 1 | 1 | 0 | 0 | 0 | 0 | 0 | 0 | 0 | 0 | 0 |
| <b>Secretion system</b> | Type VII secretion system | <i>esxD</i>    |  |  | 0 | 1 | 0 | 1 | 1 | 0 | 0 | 0 | 0 | 0 | 0 | 0 | 0 | 0 |
| <b>Toxin</b>            | Alpha hemolysin           | <i>hly/hla</i> |  |  | 0 | 1 | 1 | 1 | 1 | 0 | 0 | 0 | 0 | 0 | 0 | 0 | 0 | 0 |
| <b>Toxin</b>            | Beta hemolysin            | <i>hlyB</i>    |  |  | 0 | 1 | 1 | 1 | 1 | 1 | 0 | 0 | 0 | 0 | 0 | 0 | 0 | 0 |
| <b>Toxin</b>            | Delta hemolysin           | <i>hlyD</i>    |  |  | 0 | 1 | 1 | 1 | 1 | 1 | 0 | 0 | 0 | 0 | 0 | 0 | 0 | 0 |
| <b>Toxin</b>            | Enterotoxin A             | <i>sea</i>     |  |  | 0 | 0 | 1 | 1 | 0 | 0 | 0 | 0 | 0 | 0 | 0 | 0 | 0 | 0 |
| <b>Toxin</b>            | Enterotoxin B             | <i>seb</i>     |  |  | 0 | 0 | 0 | 0 | 0 | 0 | 0 | 0 | 0 | 0 | 0 | 0 | 0 | 0 |
| <b>Toxin</b>            | Enterotoxin C             | <i>sec</i>     |  |  | 0 | 0 | 0 | 1 | 0 | 0 | 0 | 0 | 0 | 0 | 0 | 0 | 0 | 0 |
| <b>Toxin</b>            | Enterotoxin D             | <i>sed</i>     |  |  | 0 | 0 | 0 | 0 | 0 | 0 | 0 | 0 | 0 | 0 | 0 | 0 | 0 | 0 |
| <b>Toxin</b>            | Enterotoxin E             | <i>see</i>     |  |  | 0 | 0 | 0 | 0 | 0 | 0 | 0 | 0 | 0 | 0 | 0 | 0 | 0 | 0 |
| <b>Toxin</b>            | Enterotoxin G             | <i>seg</i>     |  |  | 0 | 1 | 1 | 0 | 0 | 0 | 0 | 0 | 0 | 0 | 0 | 0 | 0 | 0 |
| <b>Toxin</b>            | Enterotoxin H             | <i>seh</i>     |  |  | 0 | 0 | 0 | 1 | 0 | 0 | 0 | 0 | 0 | 0 | 0 | 0 | 0 | 0 |
| <b>Toxin</b>            | Enterotoxin I             | <i>sei</i>     |  |  | 0 | 1 | 1 | 0 | 0 | 0 | 0 | 0 | 0 | 0 | 0 | 0 | 0 | 0 |
| <b>Toxin</b>            | Enterotoxin J             | <i>sej</i>     |  |  | 0 | 0 | 0 | 0 | 0 | 0 | 0 | 0 | 0 | 0 | 0 | 0 | 0 | 0 |
| <b>Toxin</b>            | Enterotoxin Yent1         | <i>yent1</i>   |  |  | 0 | 0 | 0 | 0 | 0 | 0 | 0 | 0 | 0 | 0 | 0 | 0 | 0 | 0 |
| <b>Toxin</b>            | Enterotoxin Yent2         | <i>yent2</i>   |  |  | 0 | 0 | 0 | 0 | 0 | 0 | 0 | 0 | 0 | 0 | 0 | 0 | 0 | 0 |
| <b>Toxin</b>            | Enterotoxin-like K        | <i>selk</i>    |  |  | 0 | 0 | 0 | 1 | 1 | 0 | 0 | 0 | 0 | 0 | 0 | 0 | 0 | 0 |
| <b>Toxin</b>            | Enterotoxin-like L        | <i>sell</i>    |  |  | 0 | 0 | 0 | 1 | 0 | 0 | 0 | 0 | 0 | 0 | 0 | 0 | 0 | 0 |
| <b>Toxin</b>            | Enterotoxin-like M        | <i>selm</i>    |  |  | 0 | 1 | 1 | 0 | 0 | 0 | 0 | 0 | 0 | 0 | 0 | 0 | 0 | 0 |
| <b>Toxin</b>            | Enterotoxin-like N        | <i>seln</i>    |  |  | 0 | 1 | 1 | 0 | 0 | 0 | 0 | 0 | 0 | 0 | 0 | 0 | 0 | 0 |
| <b>Toxin</b>            | Enterotoxin-like O        | <i>selo</i>    |  |  | 0 | 1 | 1 | 0 | 0 | 0 | 0 | 0 | 0 | 0 | 0 | 0 | 0 | 0 |
| <b>Toxin</b>            | Enterotoxin-like P        | <i>selp</i>    |  |  | 0 | 0 | 0 | 0 | 0 | 0 | 0 | 0 | 0 | 0 | 0 | 0 | 0 | 0 |
| <b>Toxin</b>            | Enterotoxin-like Q        | <i>selq</i>    |  |  | 0 | 0 | 0 | 1 | 1 | 0 | 0 | 0 | 0 | 0 | 0 | 0 | 0 | 0 |
| <b>Toxin</b>            | Enterotoxin-like R        | <i>selr</i>    |  |  | 0 | 0 | 0 | 0 | 0 | 0 | 0 | 0 | 0 | 0 | 0 | 0 | 0 | 0 |
| <b>Toxin</b>            | Enterotoxin-like U        | <i>selu</i>    |  |  | 0 | 0 | 1 | 0 | 0 | 0 | 0 | 0 | 0 | 0 | 0 | 0 | 0 | 0 |
| <b>Toxin</b>            | Exfoliative toxin type A  | <i>eta</i>     |  |  | 0 | 1 | 1 | 1 | 1 | 0 | 0 | 0 | 0 | 0 | 0 | 0 | 0 | 0 |
| <b>Toxin</b>            | Exfoliative toxin type B  | <i>etb</i>     |  |  | 0 | 0 | 0 | 0 | 0 | 0 | 0 | 0 | 0 | 0 | 0 | 0 | 0 | 0 |

## Supplementary Materials

|              |                          |            |   |   |   |   |   |   |   |   |   |   |   |   |   |   |   |
|--------------|--------------------------|------------|---|---|---|---|---|---|---|---|---|---|---|---|---|---|---|
| <b>Toxin</b> | Exfoliative toxin type C | <i>etc</i> | 0 | 0 | 0 | 0 | 0 | 0 | 0 | 0 | 0 | 0 | 0 | 0 | 0 | 0 | 0 |
| <b>Toxin</b> | Exfoliative toxin type D | <i>etd</i> | 0 | 0 | 0 | 0 | 0 | 0 | 0 | 0 | 0 | 0 | 0 | 0 | 0 | 0 | 0 |
| <b>Toxin</b> | Exotoxin                 | set10      | 0 | 1 | 0 | 0 | 0 | 0 | 0 | 0 | 0 | 0 | 0 | 0 | 0 | 0 | 0 |
| <b>Toxin</b> | Exotoxin                 | set11      | 0 | 1 | 0 | 0 | 0 | 0 | 0 | 0 | 0 | 0 | 0 | 0 | 0 | 0 | 0 |
| <b>Toxin</b> | Exotoxin                 | set12      | 0 | 1 | 0 | 0 | 0 | 0 | 0 | 0 | 0 | 0 | 0 | 0 | 0 | 0 | 0 |
| <b>Toxin</b> | Exotoxin                 | set13      | 0 | 1 | 0 | 0 | 0 | 0 | 0 | 0 | 0 | 0 | 0 | 0 | 0 | 0 | 0 |
| <b>Toxin</b> | Exotoxin                 | set14      | 0 | 1 | 0 | 0 | 0 | 0 | 0 | 0 | 0 | 0 | 0 | 0 | 0 | 0 | 0 |
| <b>Toxin</b> | Exotoxin                 | set15      | 0 | 1 | 0 | 0 | 0 | 0 | 0 | 0 | 0 | 0 | 0 | 0 | 0 | 0 | 0 |
| <b>Toxin</b> | Exotoxin                 | set16      | 0 | 0 | 0 | 1 | 0 | 0 | 0 | 0 | 0 | 0 | 0 | 0 | 0 | 0 | 0 |
| <b>Toxin</b> | Exotoxin                 | set17      | 0 | 0 | 0 | 1 | 0 | 0 | 0 | 0 | 0 | 0 | 0 | 0 | 0 | 0 | 0 |
| <b>Toxin</b> | Exotoxin                 | set18      | 0 | 0 | 0 | 1 | 0 | 0 | 0 | 0 | 0 | 0 | 0 | 0 | 0 | 0 | 0 |
| <b>Toxin</b> | Exotoxin                 | set19      | 0 | 0 | 0 | 1 | 0 | 0 | 0 | 0 | 0 | 0 | 0 | 0 | 0 | 0 | 0 |
| <b>Toxin</b> | Exotoxin                 | set1       | 0 | 0 | 1 | 0 | 0 | 0 | 0 | 0 | 0 | 0 | 0 | 0 | 0 | 0 | 0 |
| <b>Toxin</b> | Exotoxin                 | set20      | 0 | 0 | 0 | 1 | 0 | 0 | 0 | 0 | 0 | 0 | 0 | 0 | 0 | 0 | 0 |
| <b>Toxin</b> | Exotoxin                 | set21      | 0 | 0 | 0 | 1 | 0 | 0 | 0 | 0 | 0 | 0 | 0 | 0 | 0 | 0 | 0 |
| <b>Toxin</b> | Exotoxin                 | set22      | 0 | 0 | 0 | 1 | 0 | 0 | 0 | 0 | 0 | 0 | 0 | 0 | 0 | 0 | 0 |
| <b>Toxin</b> | Exotoxin                 | set23      | 0 | 0 | 0 | 1 | 0 | 0 | 0 | 0 | 0 | 0 | 0 | 0 | 0 | 0 | 0 |
| <b>Toxin</b> | Exotoxin                 | set24      | 0 | 0 | 0 | 1 | 0 | 0 | 0 | 0 | 0 | 0 | 0 | 0 | 0 | 0 | 0 |
| <b>Toxin</b> | Exotoxin                 | set25      | 0 | 0 | 0 | 1 | 0 | 0 | 0 | 0 | 0 | 0 | 0 | 0 | 0 | 0 | 0 |
| <b>Toxin</b> | Exotoxin                 | set26      | 0 | 0 | 0 | 1 | 0 | 0 | 0 | 0 | 0 | 0 | 0 | 0 | 0 | 0 | 0 |
| <b>Toxin</b> | Exotoxin                 | set2       | 0 | 0 | 1 | 0 | 0 | 0 | 0 | 0 | 0 | 0 | 0 | 0 | 0 | 0 | 0 |
| <b>Toxin</b> | Exotoxin                 | set30      | 0 | 0 | 0 | 0 | 1 | 0 | 0 | 0 | 0 | 0 | 0 | 0 | 0 | 0 | 0 |
| <b>Toxin</b> | Exotoxin                 | set31      | 0 | 0 | 0 | 0 | 1 | 0 | 0 | 0 | 0 | 0 | 0 | 0 | 0 | 0 | 0 |
| <b>Toxin</b> | Exotoxin                 | set32      | 0 | 0 | 0 | 0 | 1 | 0 | 0 | 0 | 0 | 0 | 0 | 0 | 0 | 0 | 0 |
| <b>Toxin</b> | Exotoxin                 | set33      | 0 | 0 | 0 | 0 | 1 | 0 | 0 | 0 | 0 | 0 | 0 | 0 | 0 | 0 | 0 |
| <b>Toxin</b> | Exotoxin                 | set34      | 0 | 0 | 0 | 0 | 1 | 0 | 0 | 0 | 0 | 0 | 0 | 0 | 0 | 0 | 0 |
| <b>Toxin</b> | Exotoxin                 | set35      | 0 | 0 | 0 | 0 | 1 | 0 | 0 | 0 | 0 | 0 | 0 | 0 | 0 | 0 | 0 |
| <b>Toxin</b> | Exotoxin                 | set36      | 0 | 0 | 0 | 0 | 1 | 0 | 0 | 0 | 0 | 0 | 0 | 0 | 0 | 0 | 0 |

## Supplementary Materials

|                                  |                                        |                  |              |   |   |   |   |   |   |   |   |   |   |   |   |   |   |   |
|----------------------------------|----------------------------------------|------------------|--------------|---|---|---|---|---|---|---|---|---|---|---|---|---|---|---|
| <b>Toxin</b>                     | Exotoxin                               | set37            |              | 0 | 0 | 0 | 0 | 1 | 0 | 0 | 0 | 0 | 0 | 0 | 0 | 0 | 0 |   |
| <b>Toxin</b>                     | Exotoxin                               | set38            |              | 0 | 0 | 0 | 0 | 1 | 0 | 0 | 0 | 0 | 0 | 0 | 0 | 0 | 0 |   |
| <b>Toxin</b>                     | Exotoxin                               | set39            |              | 0 | 0 | 0 | 0 | 1 | 0 | 0 | 0 | 0 | 0 | 0 | 0 | 0 | 0 |   |
| <b>Toxin</b>                     | Exotoxin                               | set3             |              | 0 | 0 | 1 | 0 | 0 | 0 | 0 | 0 | 0 | 0 | 0 | 0 | 0 | 0 |   |
| <b>Toxin</b>                     | Exotoxin                               | set40            |              | 0 | 0 | 0 | 0 | 1 | 0 | 0 | 0 | 0 | 0 | 0 | 0 | 0 | 0 |   |
| <b>Toxin</b>                     | Exotoxin                               | set4             |              | 0 | 0 | 1 | 0 | 0 | 0 | 0 | 0 | 0 | 0 | 0 | 0 | 0 | 0 |   |
| <b>Toxin</b>                     | Exotoxin                               | set5             |              | 0 | 0 | 1 | 0 | 0 | 0 | 0 | 0 | 0 | 0 | 0 | 0 | 0 | 0 |   |
| <b>Toxin</b>                     | Exotoxin                               | set6             |              | 0 | 1 | 0 | 0 | 0 | 0 | 0 | 0 | 0 | 0 | 0 | 0 | 0 | 0 |   |
| <b>Toxin</b>                     | Exotoxin                               | set7             |              | 0 | 1 | 0 | 0 | 0 | 0 | 0 | 0 | 0 | 0 | 0 | 0 | 0 | 0 |   |
| <b>Toxin</b>                     | Exotoxin                               | set8             |              | 0 | 1 | 0 | 0 | 0 | 0 | 0 | 0 | 0 | 0 | 0 | 0 | 0 | 0 |   |
| <b>Toxin</b>                     | Exotoxin                               | set9             |              | 0 | 1 | 0 | 0 | 0 | 0 | 0 | 0 | 0 | 0 | 0 | 0 | 0 | 0 |   |
| <b>Toxin</b>                     | Gamma hemolysin                        | <i>hlgA</i>      |              | 0 | 1 | 1 | 1 | 1 | 0 | 0 | 0 | 0 | 0 | 0 | 0 | 0 | 0 |   |
| <b>Toxin</b>                     | Gamma hemolysin                        | <i>hlgB</i>      |              | 0 | 1 | 1 | 1 | 1 | 0 | 0 | 0 | 0 | 0 | 0 | 0 | 0 | 0 |   |
| <b>Toxin</b>                     | Gamma hemolysin                        | <i>hlgC</i>      |              | 0 | 1 | 1 | 1 | 1 | 0 | 0 | 0 | 0 | 0 | 0 | 0 | 0 | 0 |   |
| <b>Toxin</b>                     | Leukocidin M                           | <i>lukF-like</i> |              | 0 | 0 | 0 | 0 | 0 | 0 | 0 | 0 | 0 | 0 | 0 | 0 | 0 | 0 |   |
| <b>Toxin</b>                     | Leukocidin M                           | <i>lukM</i>      |              | 0 | 0 | 0 | 0 | 0 | 0 | 0 | 0 | 0 | 0 | 0 | 0 | 0 | 0 |   |
| <b>Toxin</b>                     | Leukotoxin D                           | <i>lukD</i>      |              | 0 | 1 | 1 | 1 | 1 | 0 | 0 | 0 | 0 | 0 | 0 | 0 | 0 | 0 |   |
| <b>Toxin</b>                     | Leukotoxin E                           | <i>lukE</i>      |              | 0 | 1 | 1 | 1 | 1 | 0 | 0 | 0 | 0 | 0 | 0 | 0 | 0 | 0 |   |
| <b>Toxin</b>                     | Panton-Valentine leukocidin            | <i>lukF-PV</i>   |              | 0 | 0 | 0 | 1 | 1 | 0 | 0 | 0 | 0 | 0 | 0 | 0 | 0 | 0 |   |
| <b>Toxin</b>                     | Panton-Valentine leukocidin            | <i>lukS-PV</i>   |              | 0 | 0 | 0 | 1 | 1 | 0 | 0 | 0 | 0 | 0 | 0 | 0 | 0 | 0 |   |
| <b>Toxin</b>                     | Toxic shock syndrome toxin             | <i>tsst</i>      |              | 0 | 0 | 0 | 0 | 0 | 0 | 0 | 0 | 0 | 0 | 0 | 0 | 0 | 0 |   |
| <b>Phagosome arresting</b>       | Nucleoside diphosphate kinase          | <i>ndk</i>       | SSCS72_01502 | 1 | 0 | 0 | 0 | 0 | 0 | 0 | 0 | 0 | 0 | 0 | 0 | 1 | 1 | 1 |
| <b>Surface protein anchoring</b> | Lipoprotein diacylglycerol transferase | <i>lgt</i>       | SSCS72_02264 | 1 | 0 | 0 | 0 | 0 | 0 | 0 | 0 | 0 | 0 | 0 | 0 | 1 | 1 | 1 |

**Supplementary Table S3.** Log values [ $\log(\text{CFU mL}^{-1})$ ] of raw count data with corresponding standard deviation (SD) and antibacterial activity values (AU) of supernatant obtained during aerobic and microaerobic growth experiments, which was used for modelling. In the aerobic case, values represent the average based on three biological independent replicates.

| Time (h) | Aerobic condition          |      |                             | Microaerobic condition     |                             |
|----------|----------------------------|------|-----------------------------|----------------------------|-----------------------------|
|          | Log(CFU mL <sup>-1</sup> ) | SD   | Antibacterial activity (AU) | Log(CFU mL <sup>-1</sup> ) | Antibacterial activity (AU) |
| 0        | 5.85                       | 0.21 | 0                           | 5.39                       | 0                           |
| 2        | 5.80                       | 0.18 | 0                           | 5.28                       | 0                           |
| 4        | 6.31                       | 0.55 | 0                           | 5.89                       | 0                           |
| 6        | 6.93                       | 0.27 | 0                           | 6.17                       | 0                           |
| 8        | 7.47                       | 0.33 | 0                           | 6.94                       | 0                           |
| 10       | 7.98                       | 0.17 | 0                           | 7.69                       | 0                           |
| 12       | 8.42                       | 0.25 | 100                         | 7.43                       | 0                           |
| 14       | 8.86                       | 0.13 | 233                         | 7.92                       | 50                          |
| 16       | 9.28                       | 0.38 | 333                         | 7.90                       | 100                         |
| 18       | 9.26                       | 0.17 | 433                         | 8.12                       | 100                         |
| 20       | 9.46                       | 0.21 | 800                         | 8.18                       | 150                         |
| 22       | 9.69                       | 0.20 | 800                         | 8.18                       | 150                         |
| 24       | 9.63                       | 0.26 | 1600                        | 8.06                       | 150                         |
| 26       | 9.65                       | 0.21 | 2133                        | 8.16                       | 150                         |
| 28       | 9.68                       | 0.14 | 2400                        | 8.12                       | 200                         |
| 30       | 9.55                       | 0.13 | 2400                        | 8.19                       | 200                         |
| 32       |                            |      | 2933                        |                            | 100                         |
| 34       | 9.98                       | 0.15 | 3200                        | 8.42                       | 200                         |
| 36       |                            |      | 3200                        |                            | 150                         |
| 38       | 10.01                      | 0.09 | 3200                        | 8.75                       | 200                         |
| 40       |                            |      | 3200                        |                            | 200                         |
| 42       | 10.28                      | 0.32 | 3200                        | 8.13                       | 200                         |
| 44       |                            |      | 3200                        |                            | 300                         |
| 46       | 9.87                       | 0.10 | 3200                        | 8.13                       | 100                         |

## SUPPLEMENTARY FIGURES S1-S9

**Supplementary Figure S1.** PCR profiles of the heat-treated isolates used to determine the frequency of the plasmid genotypes found. Each isolate was screened in duplicate and is indicated with a C number above each two lanes [excluding the non-antibacterial isolates (C12, C16, C18, C22, C25, C38, C39, C47, C52, C61, C63, C76, C86, C87, C88, C94, C100, C117, C121, C127, C133, C154, C156, C167, C168 and C178), the profiles of which are shown in Supplementary Figure S2]. Lanes denoted with M represent molecular size markers, lanes denoted with N represent negative PCR controls and lanes denoted with P represent the PCR profile of the native *M. sciuri* IMDO-S72 strain.

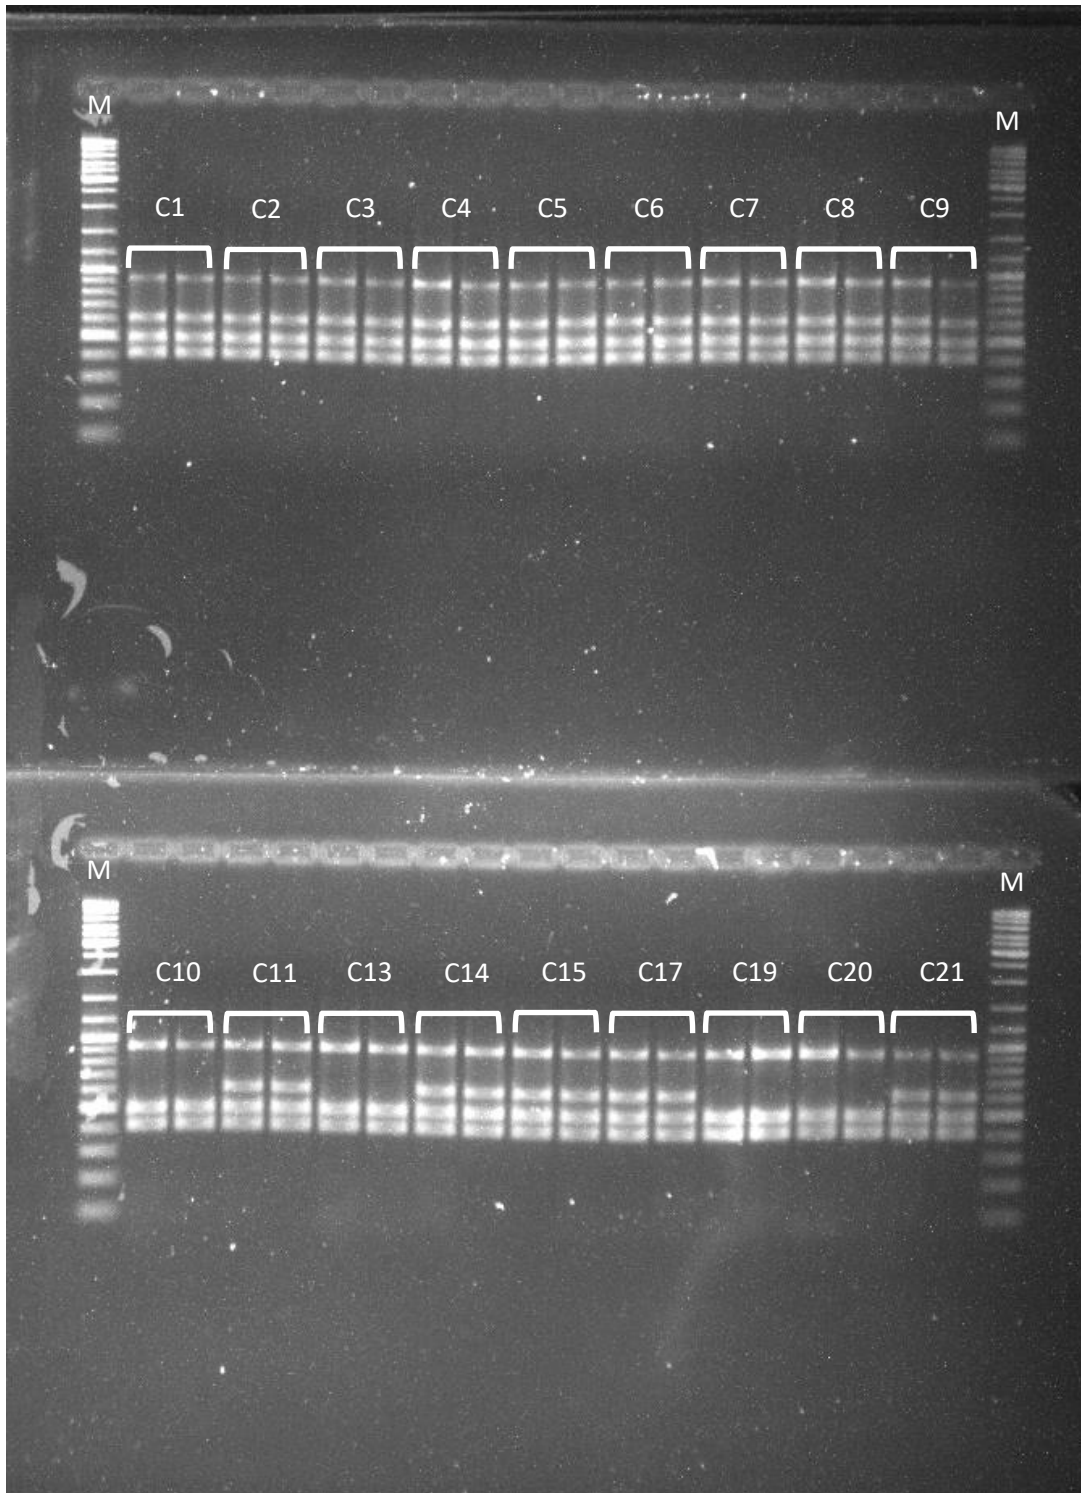

Supplementary Figure S1. *continued*

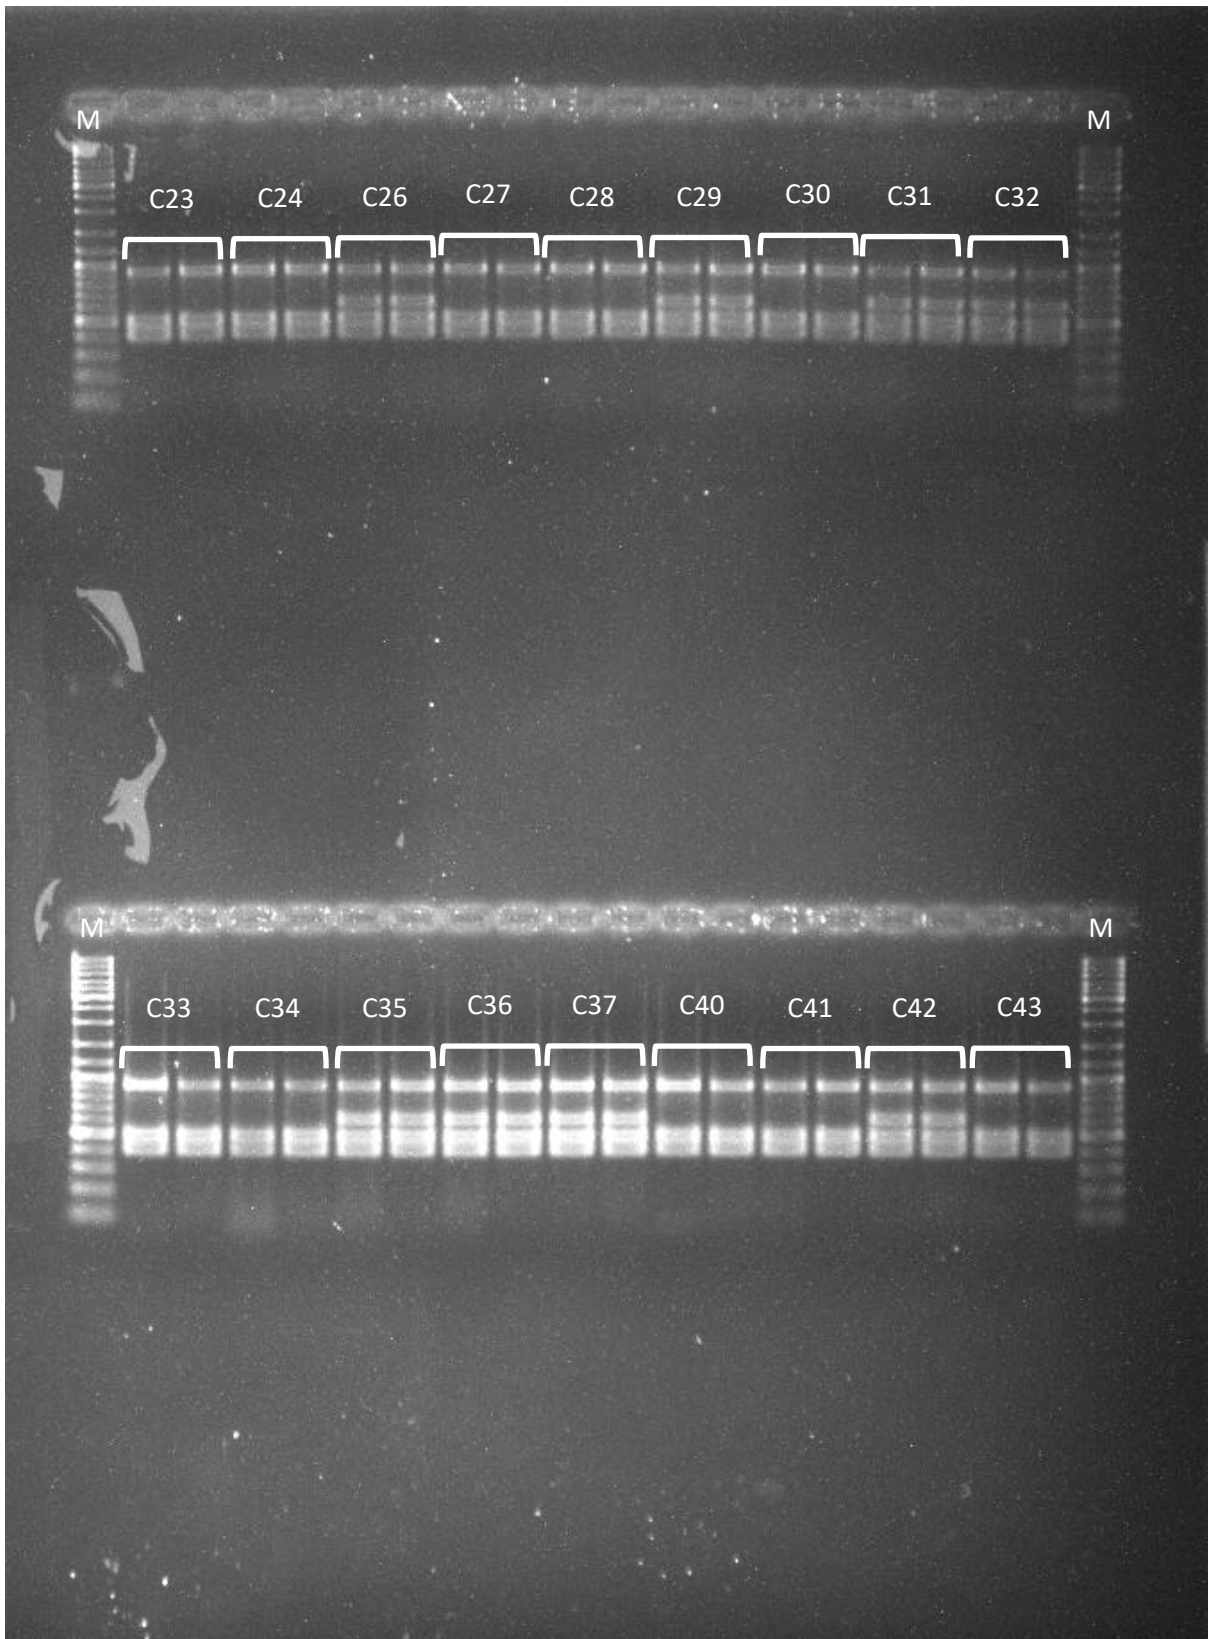

Supplementary Figure S1. *continued*

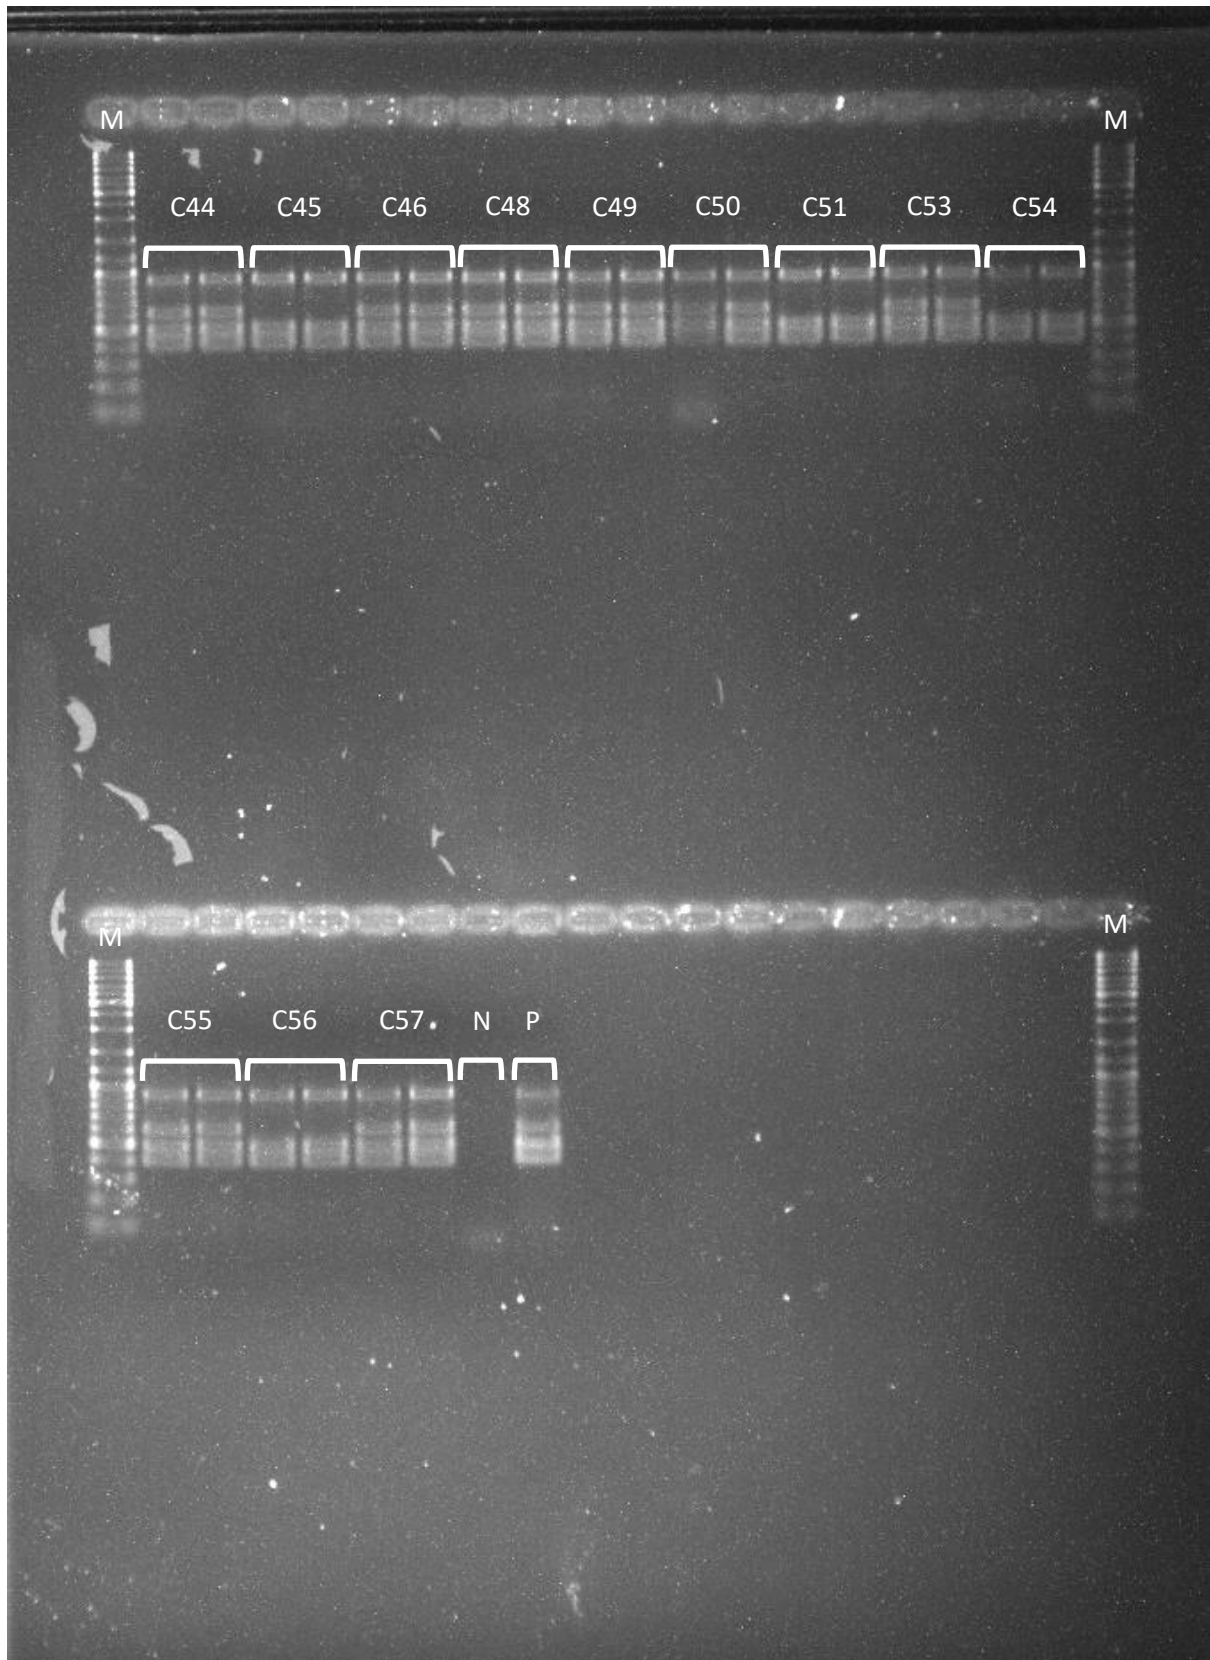

Supplementary Figure S1. *continued*

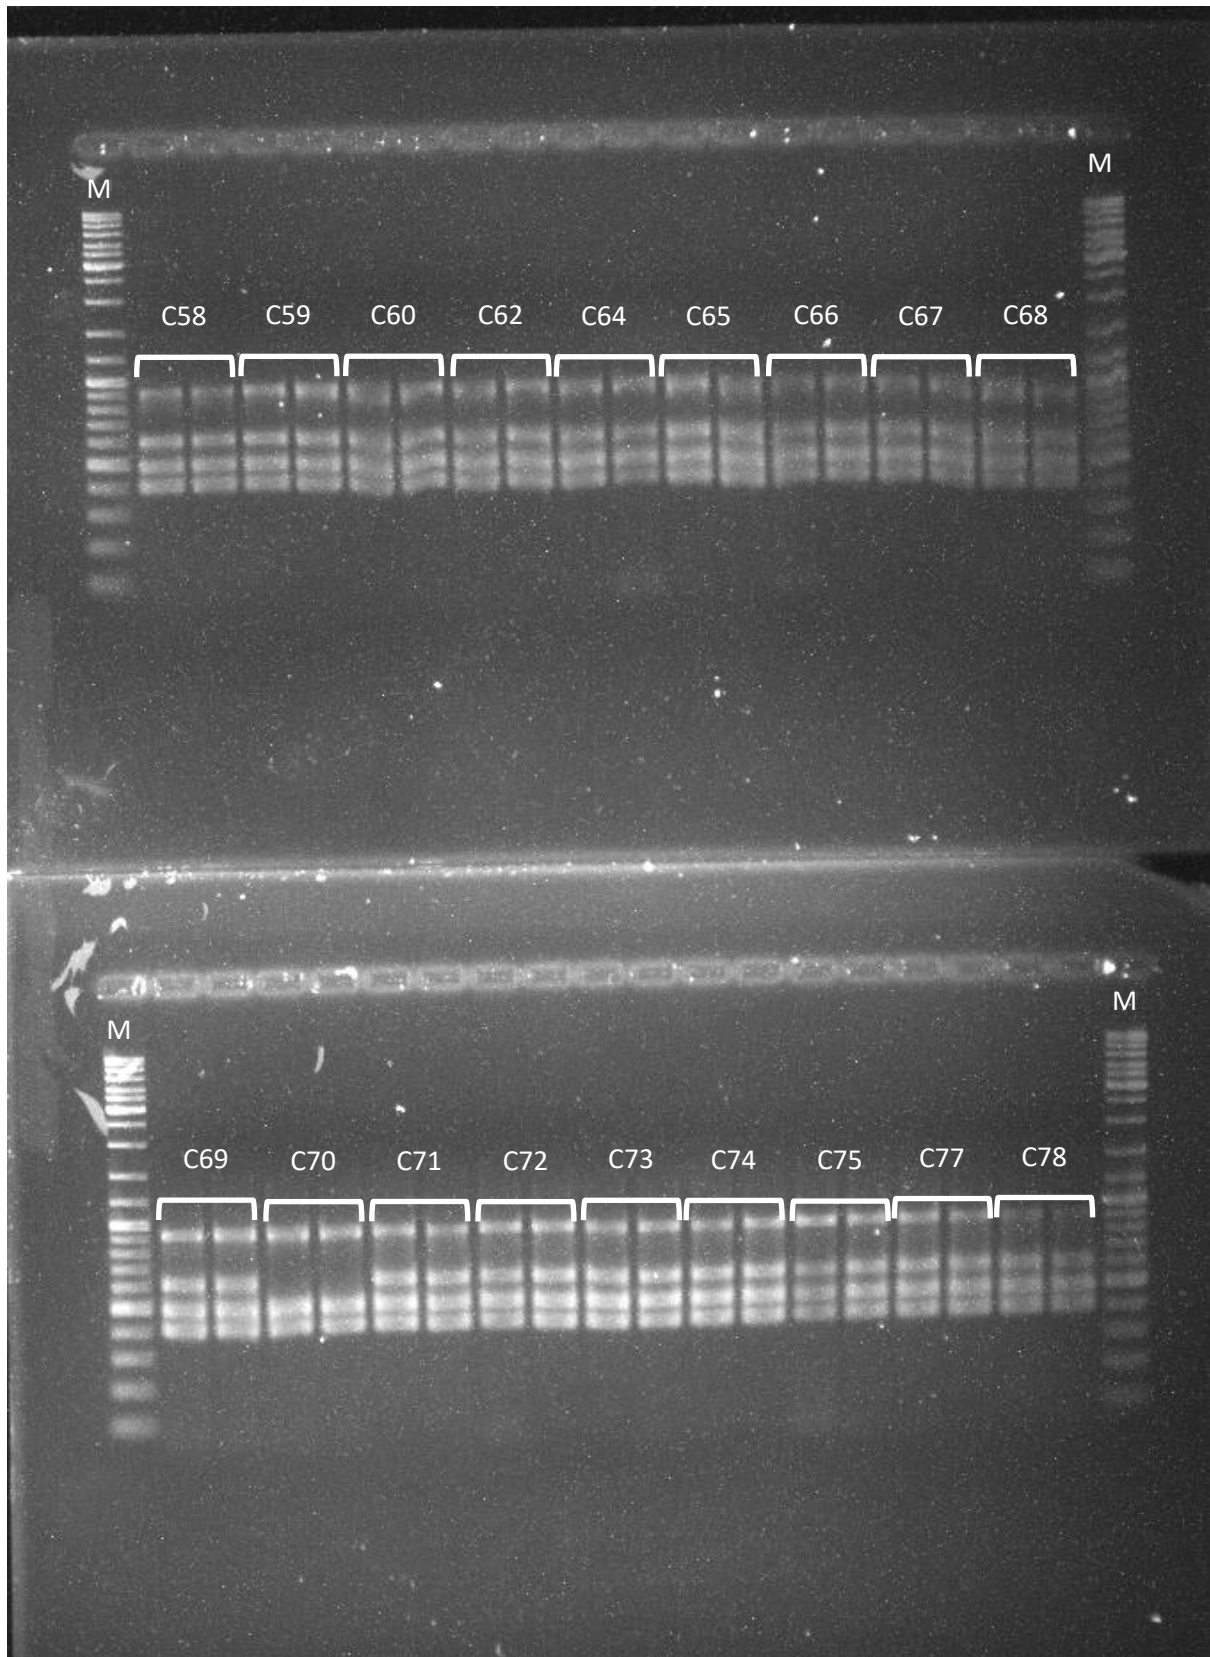



Supplementary Figure S1. *continued*

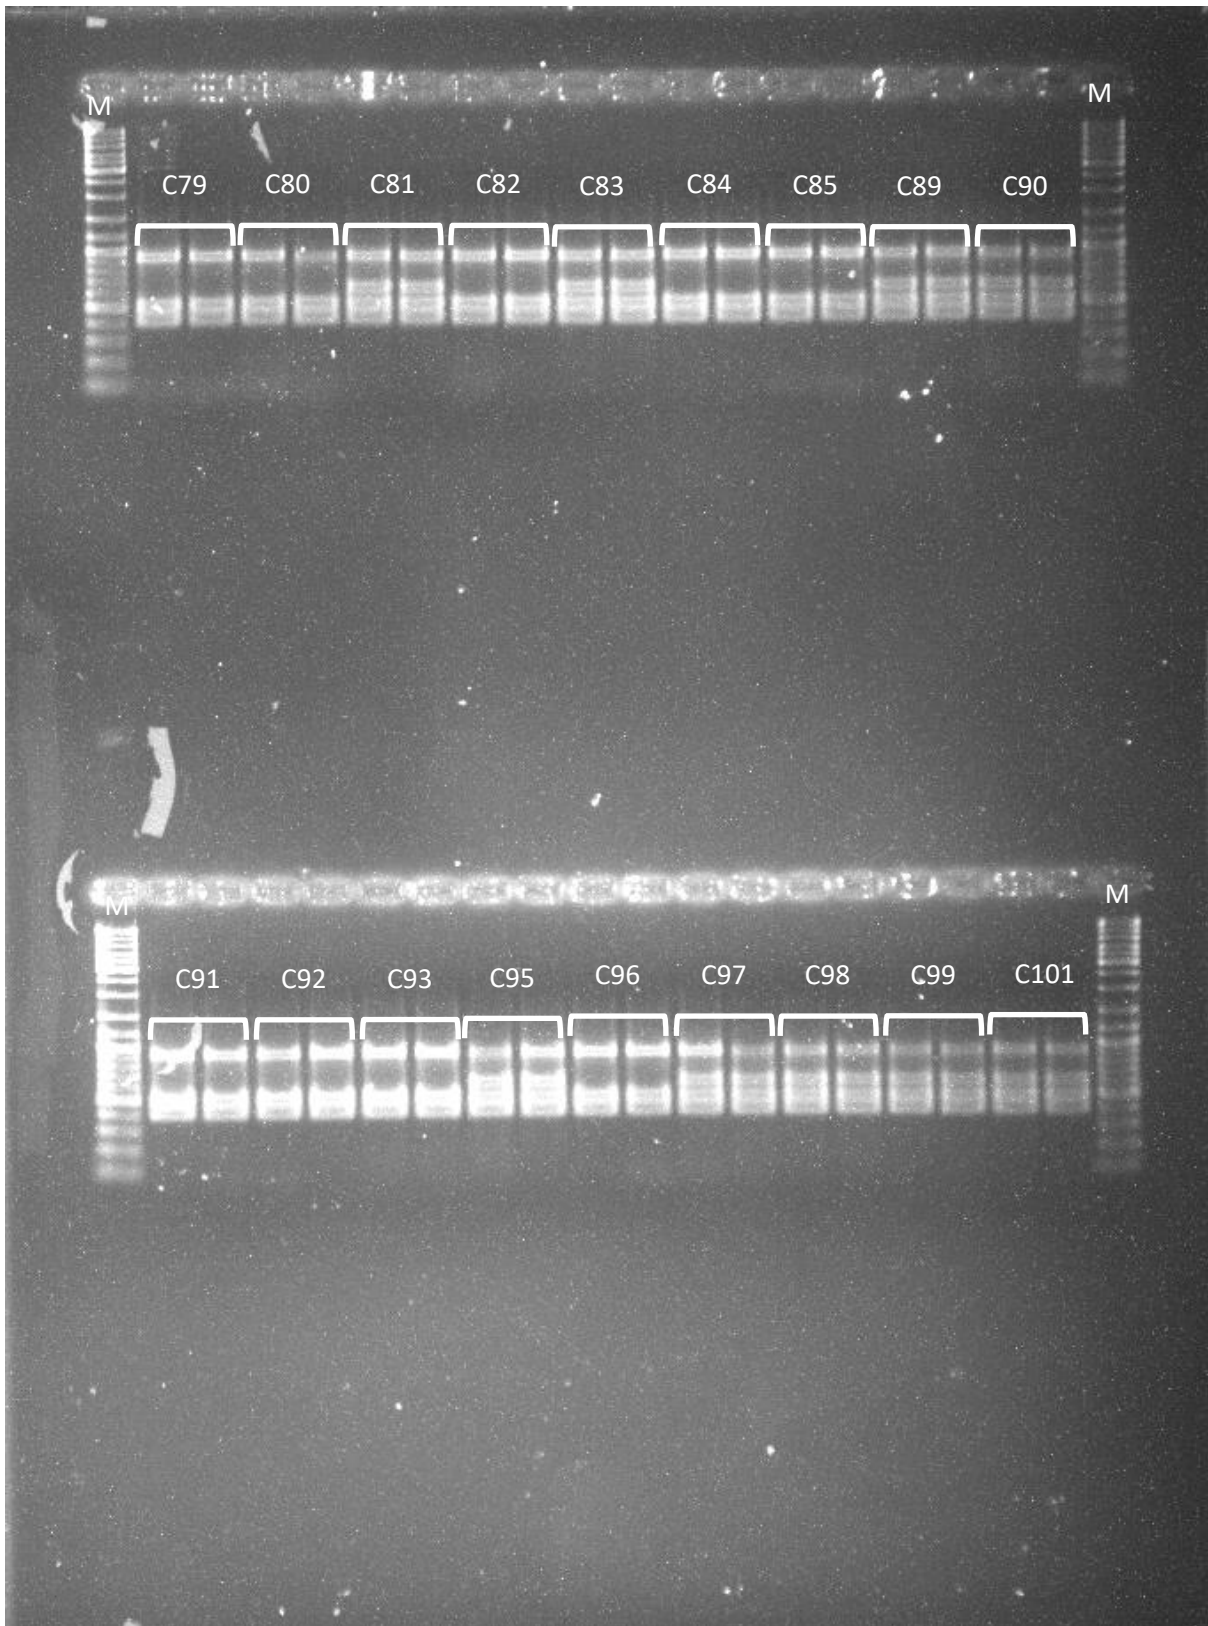

Supplementary Figure S1. *continued*

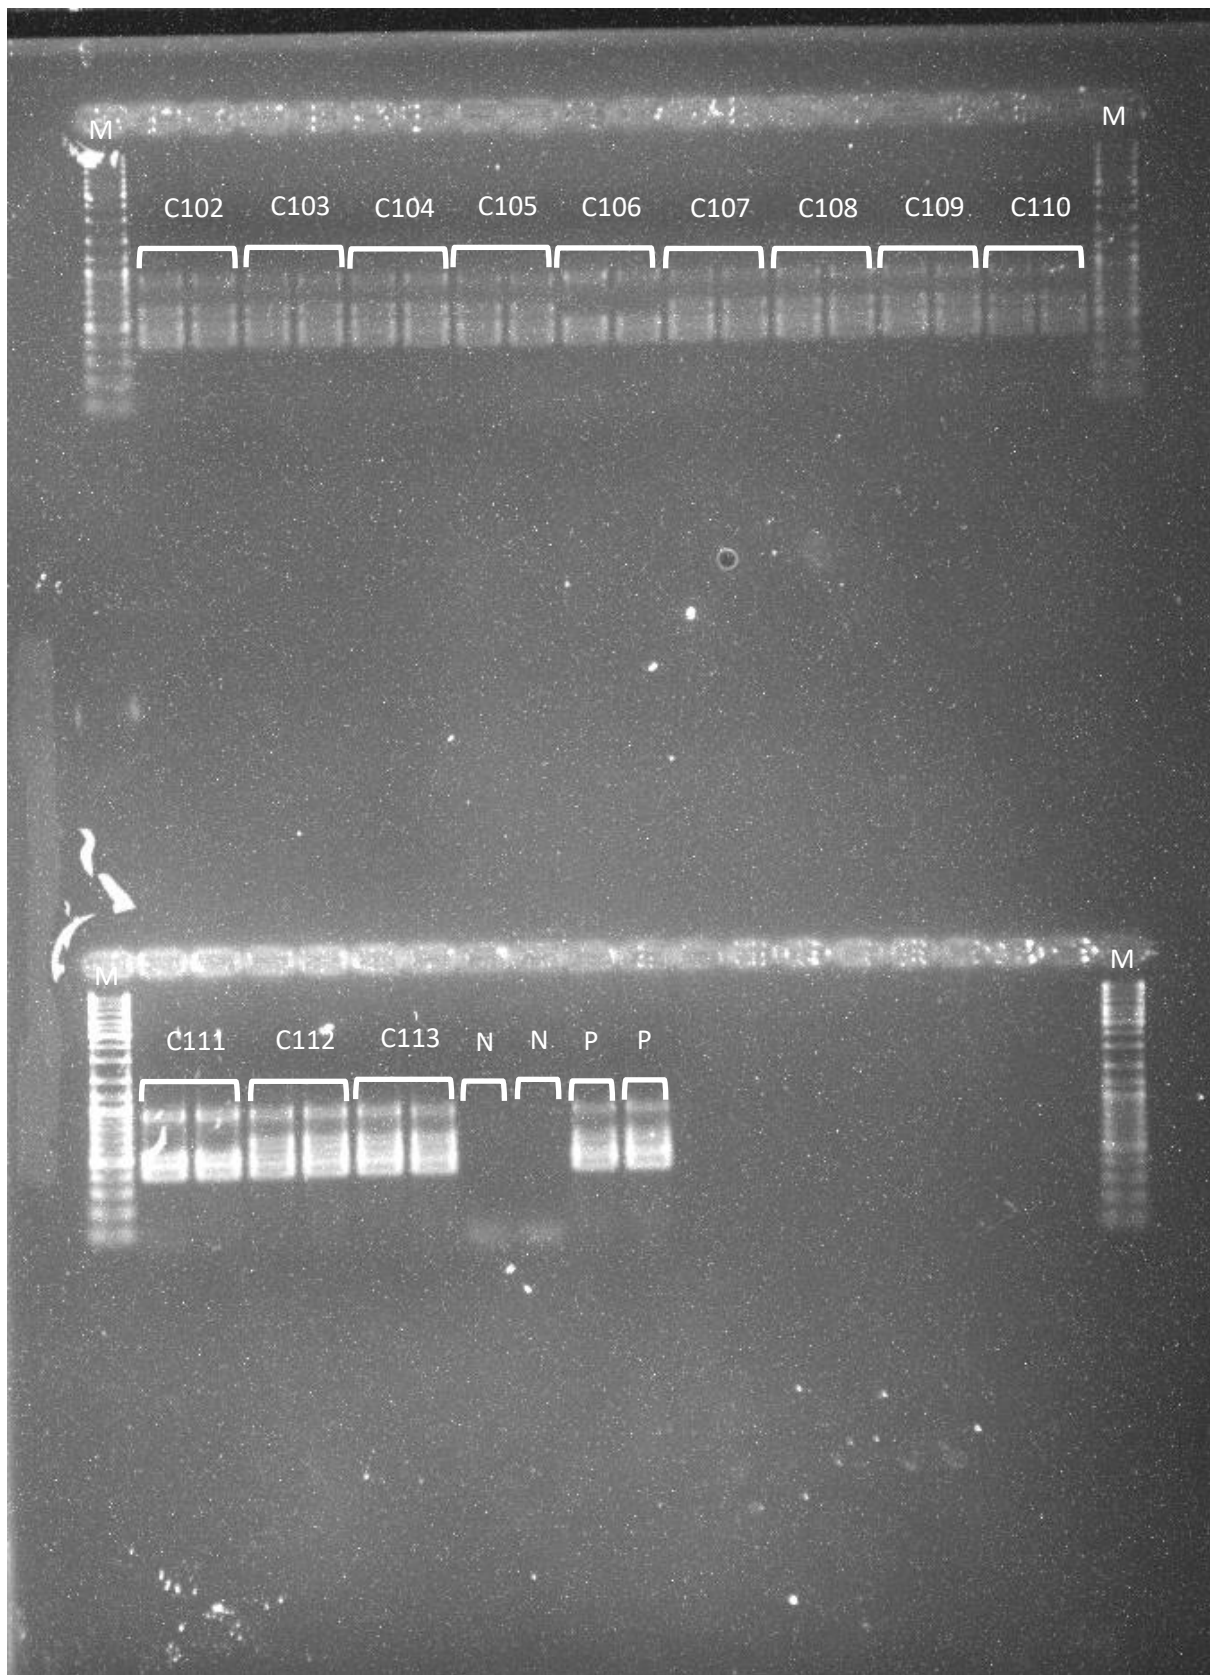

Supplementary Figure S1. *continued*

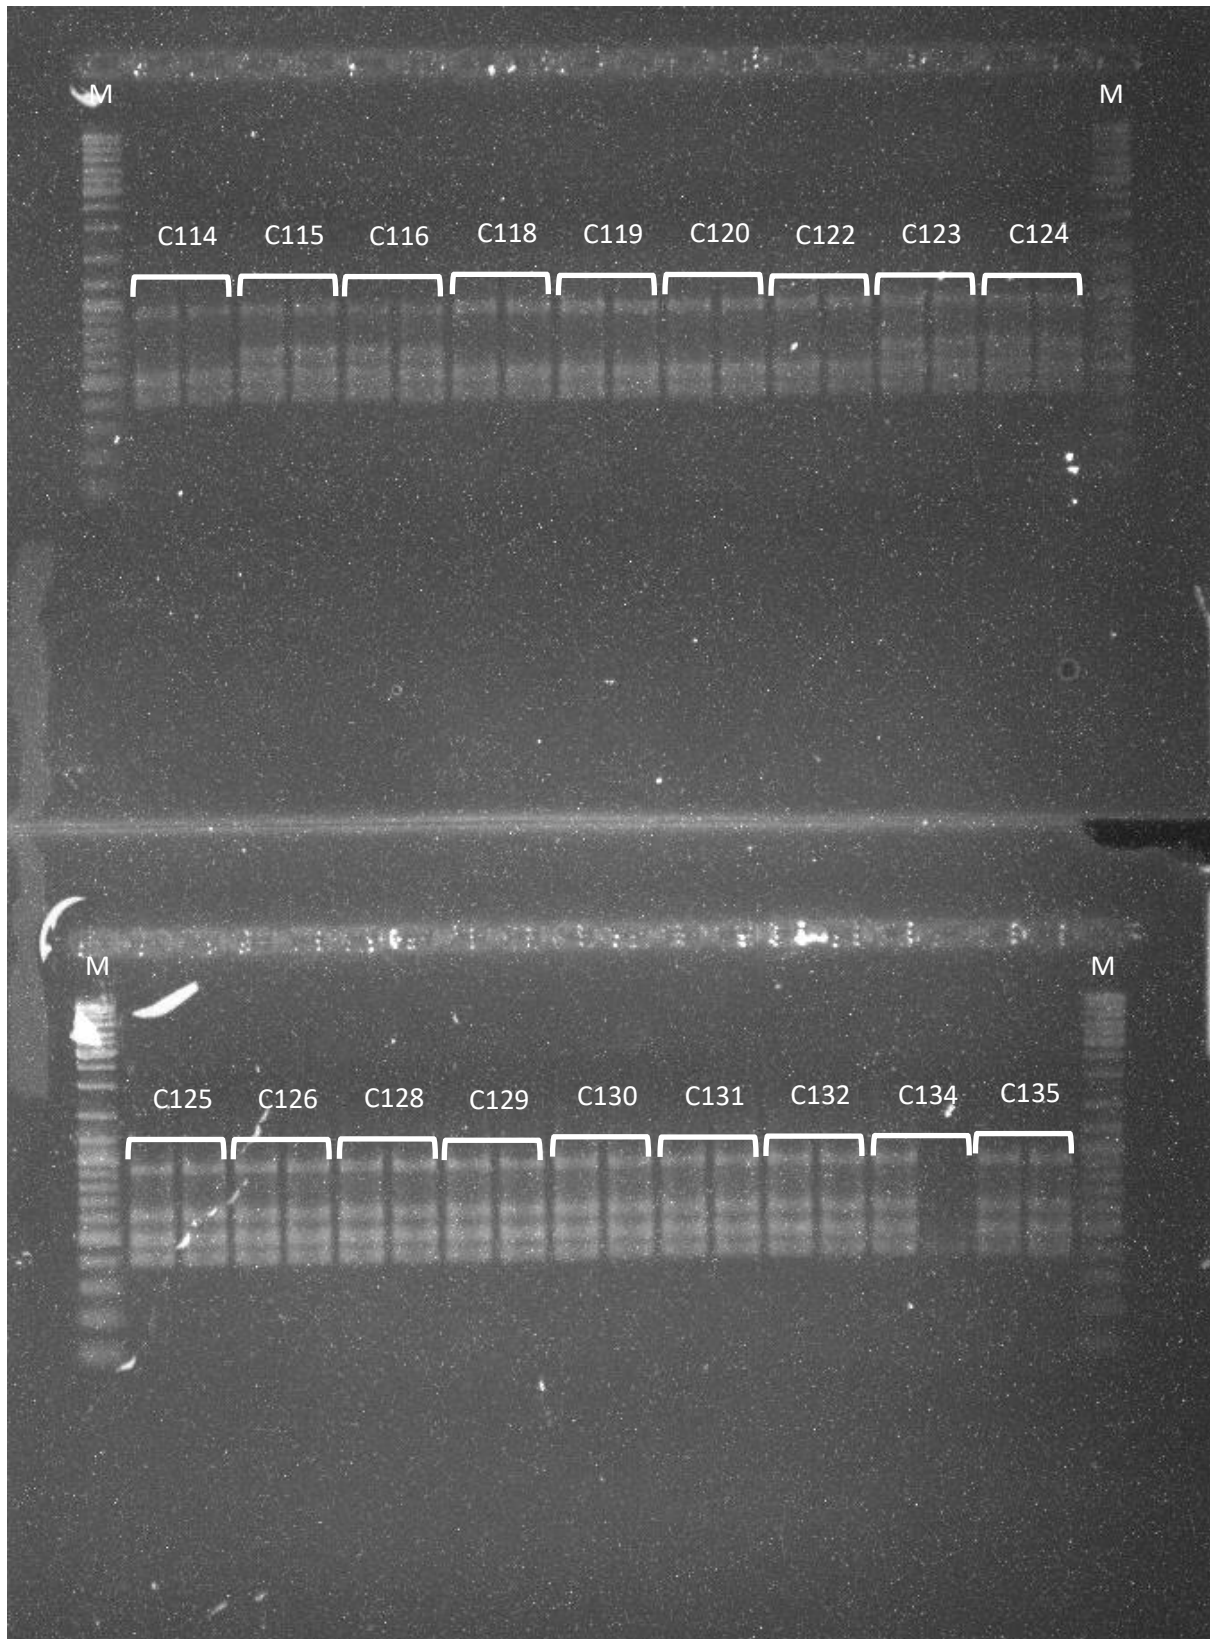

**Supplementary Figure S1.** *continued*

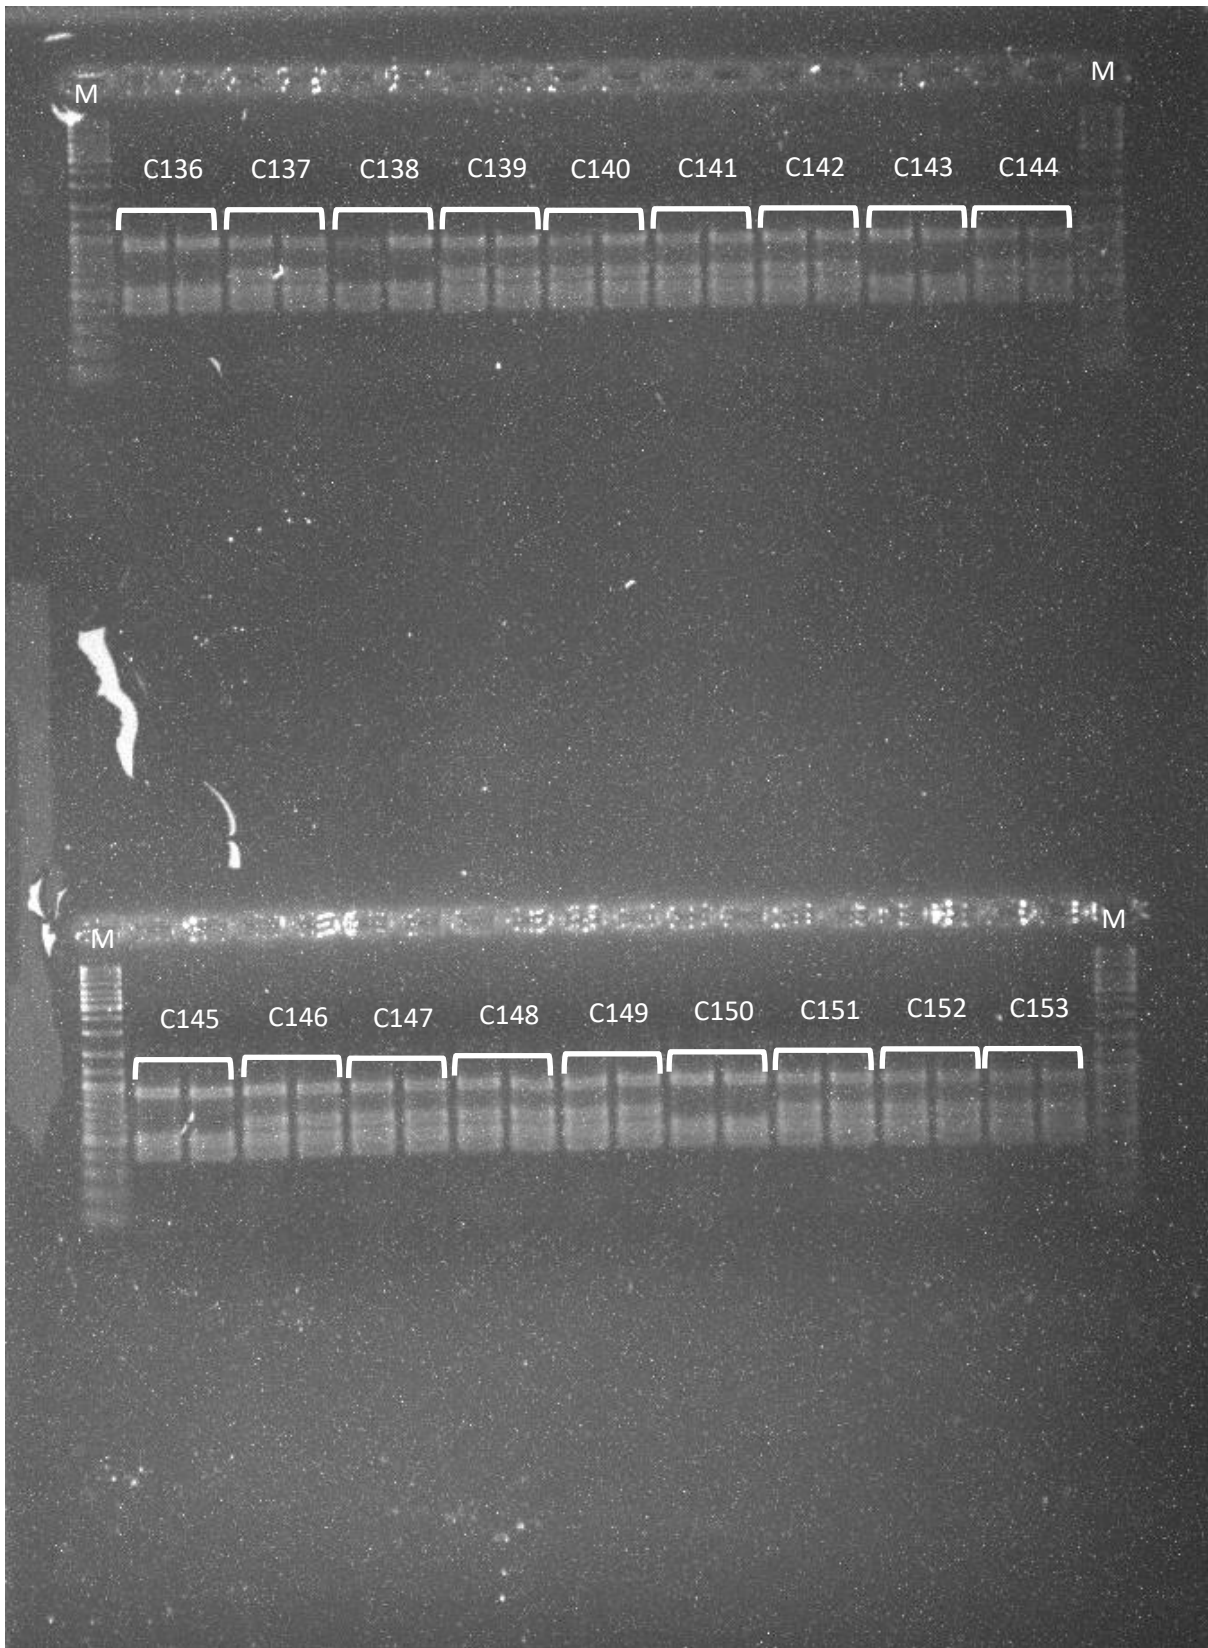

Supplementary Figure S1. *continued*

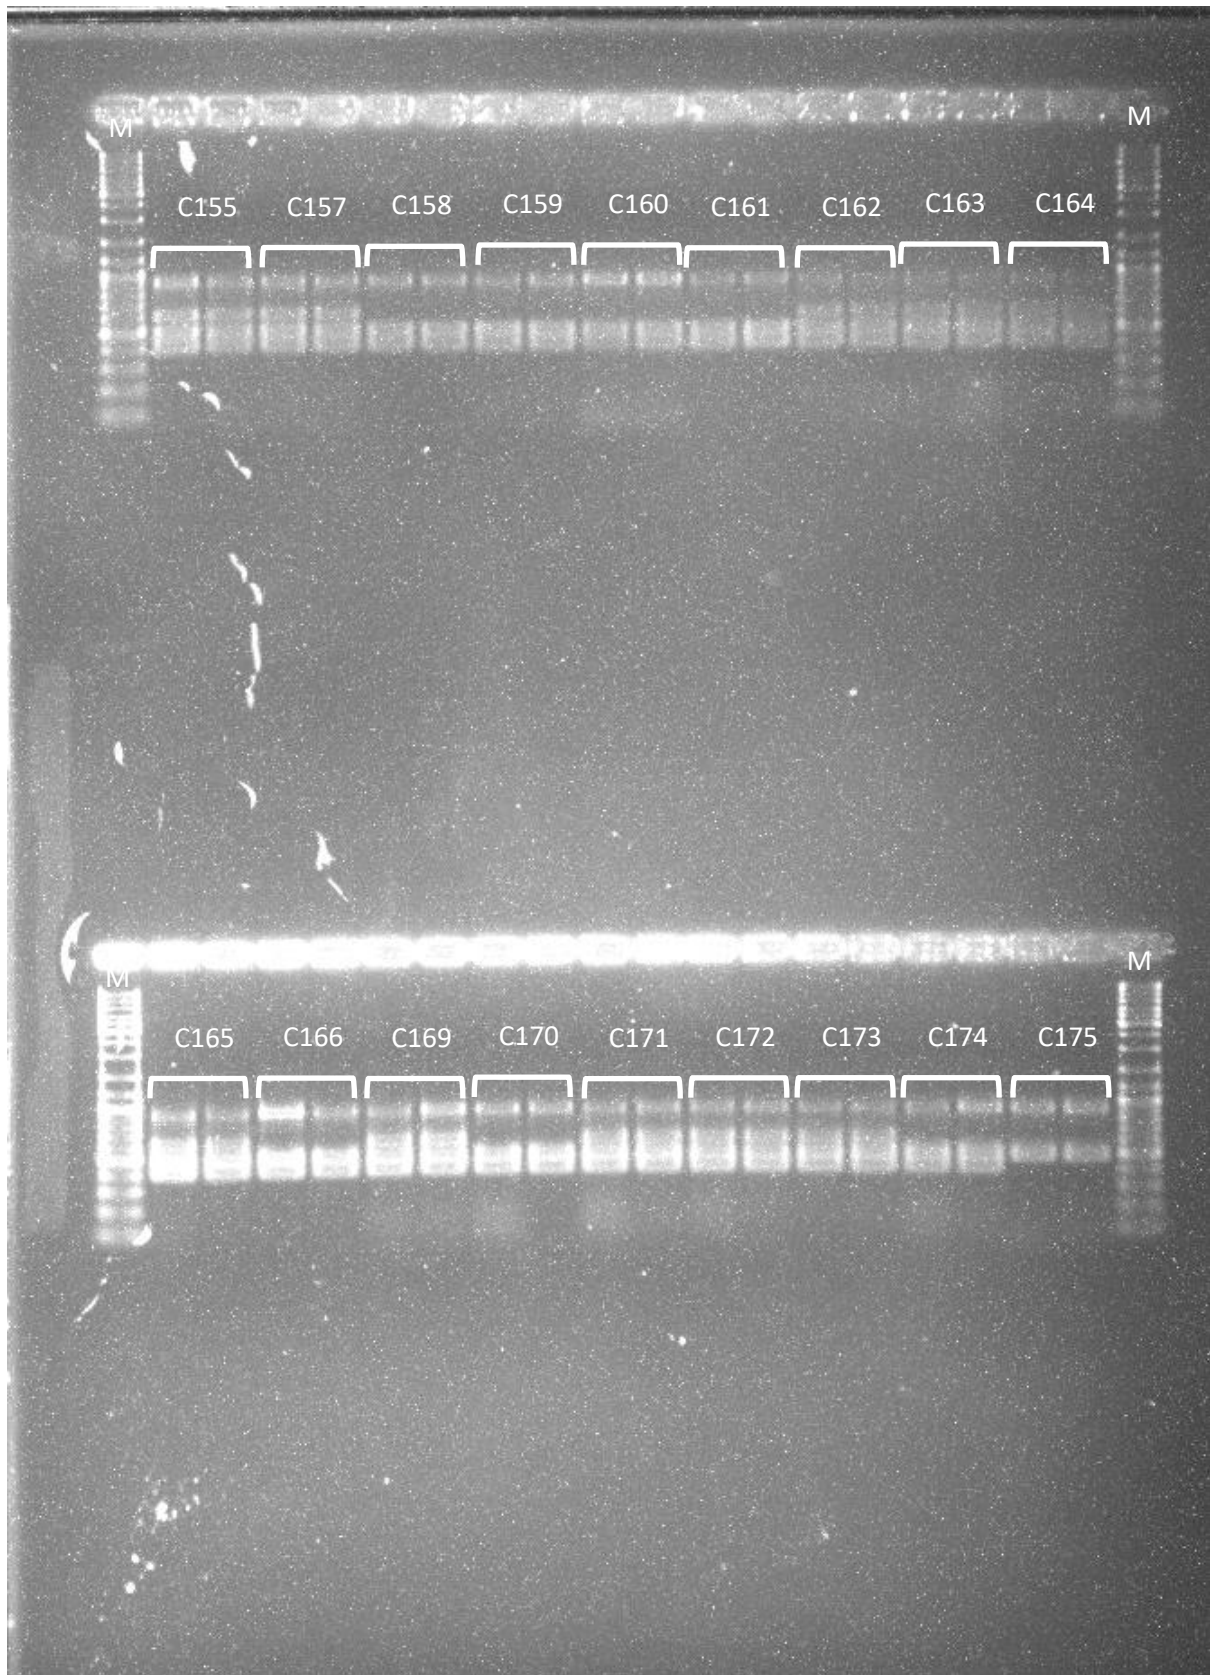

**Supplementary Figure S1.** *continued*

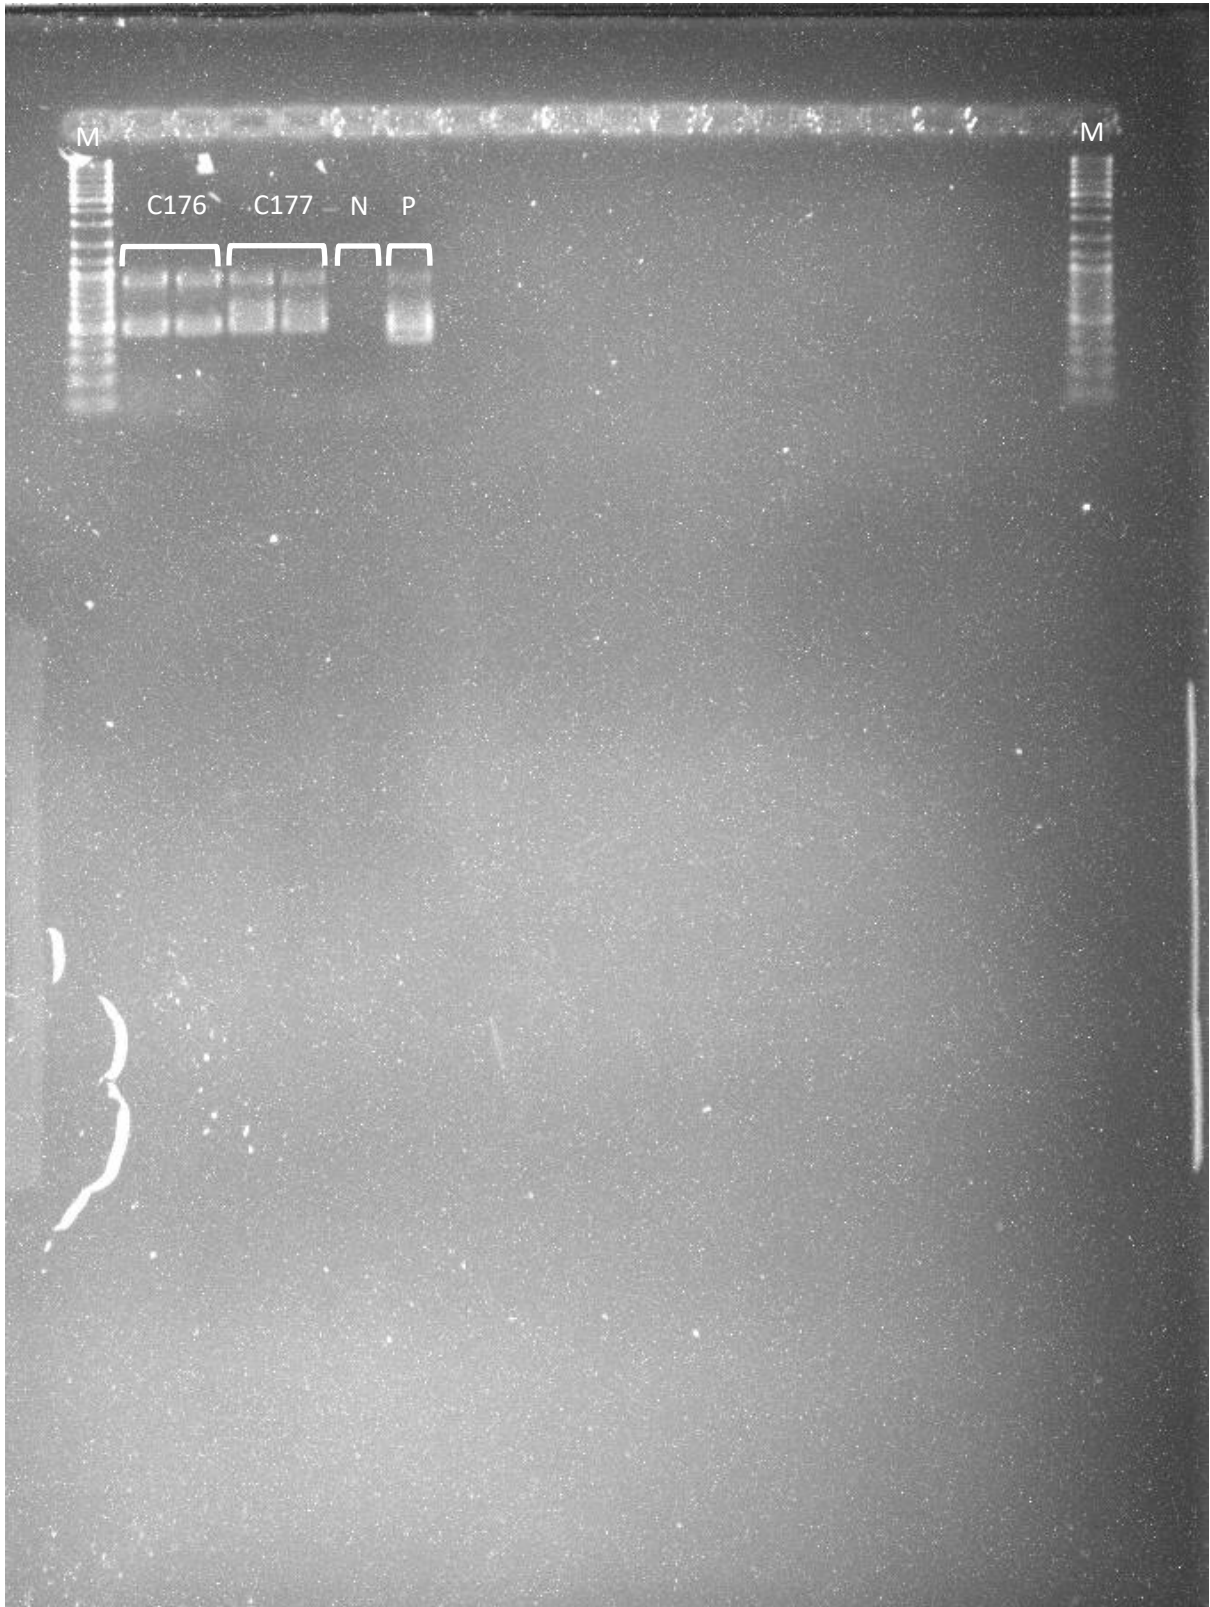

Supplementary Materials

**Supplementary Figure S2.** PCR profiles of non-antibacterial isolates (indicated with C numbers for each lane) next to the profile of the native *M. sciuri* IMDO-S72. Profiles are based on multiplex PCR using extracted genomic DNA as input. Lanes denoted with M represent molecular size markers, the lane denoted with N represents a negative PCR control.

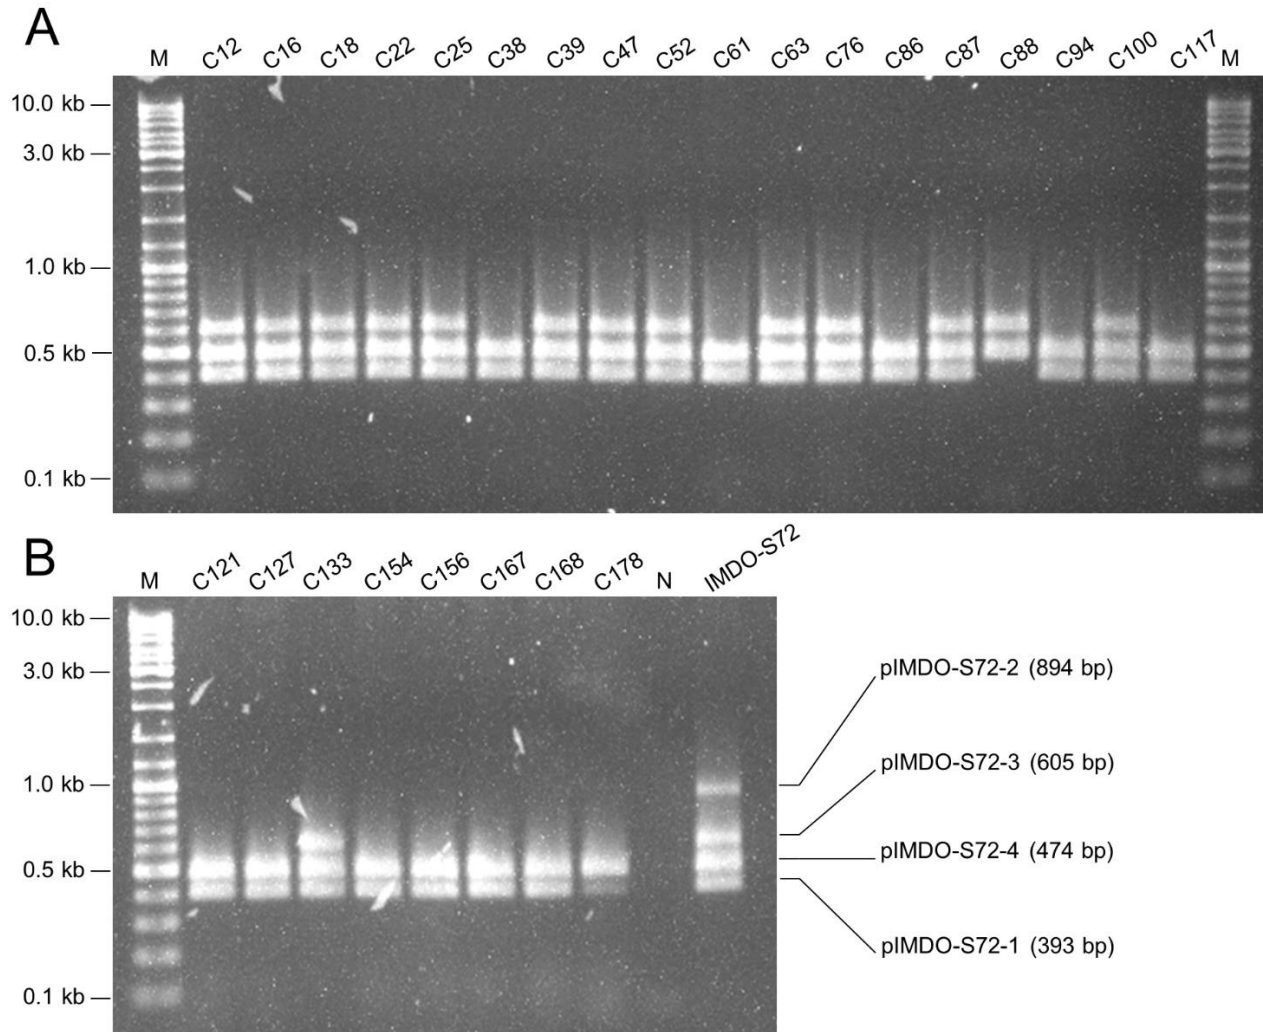

**Supplementary Figure S3.** Confirmation of the purified micrococcin P1 from fermentation supernatant with LC-MS. (A) Chromatogram showing the elution of micrococcin P1 around 15 min (upper graph) and the total ion count of the corresponding peak (lower graph). (B) Mass spectrum of the eluted fraction at 14.87 min, with an  $m/z$  ratio of 1144.572 approximating that of the protonated micrococcin P1  $[M+H]^+$ .

**A**

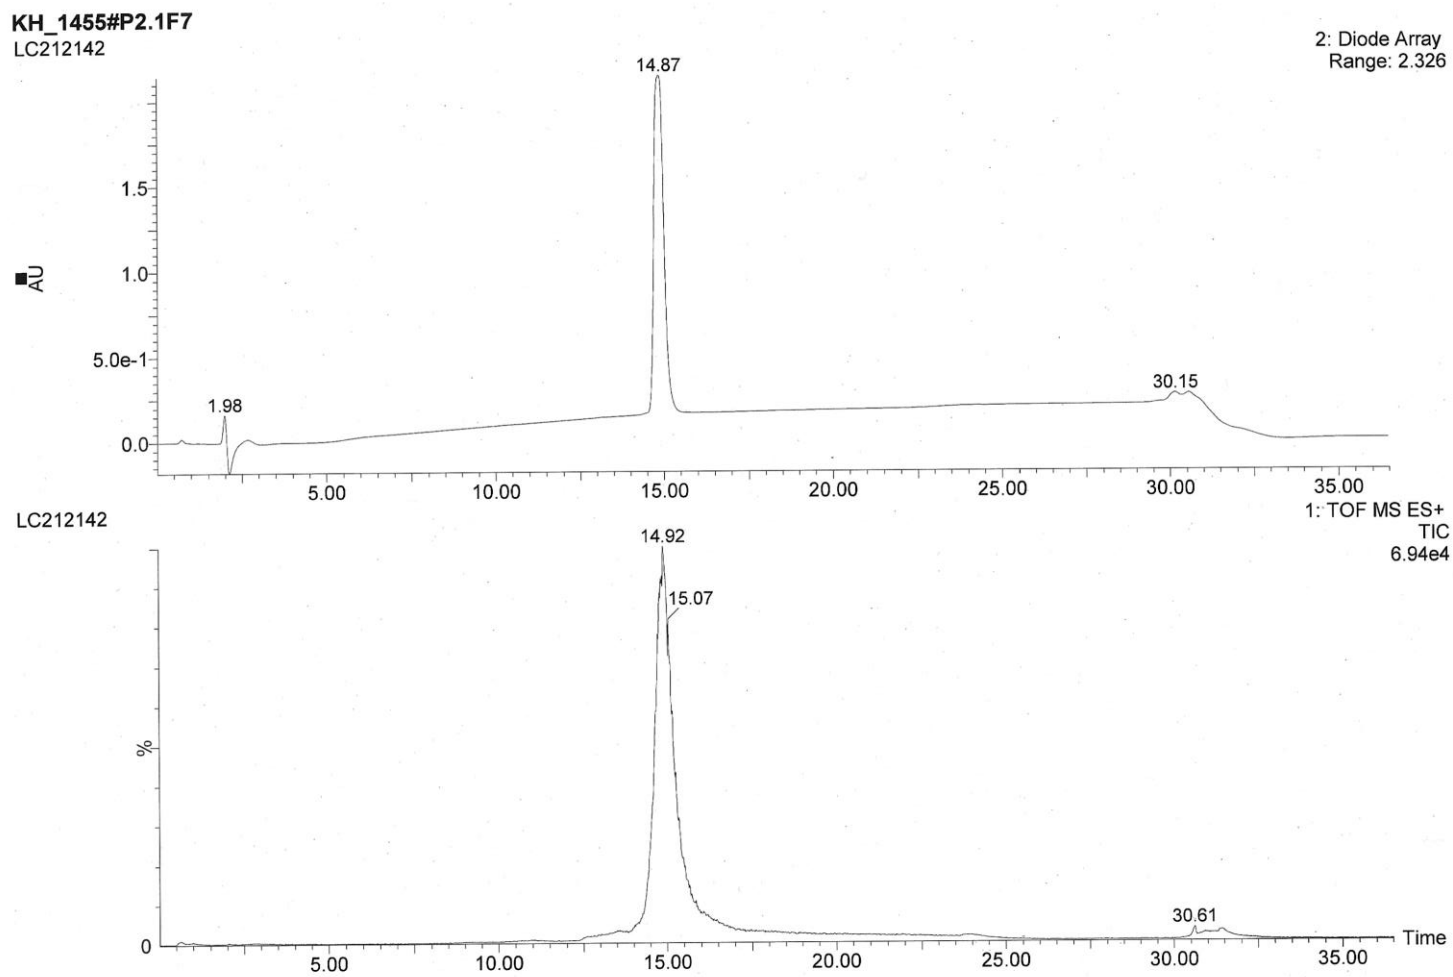



Supplementary Figure S3. *continued*

**B**

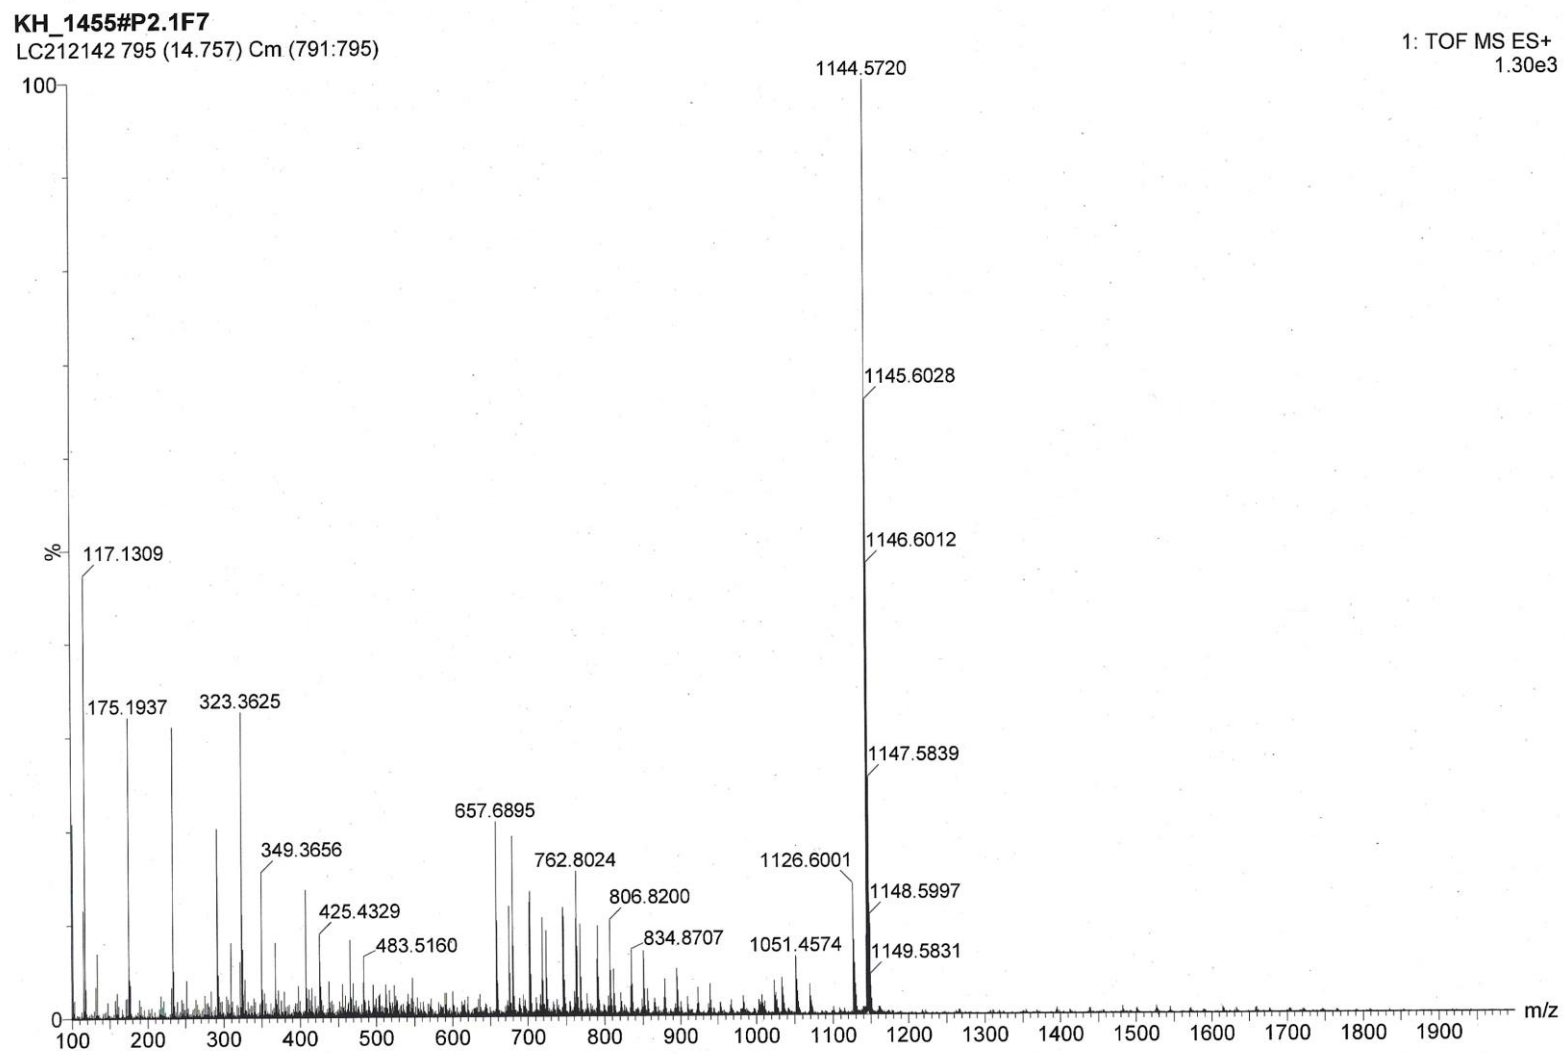

**Supplementary Figure S4.** Chromatogram of the purified micrococcin P1 extract based on reversed-phase HPLC (A) and its corresponding high-resolution mass spectrum based on HRMS (B).

**A**

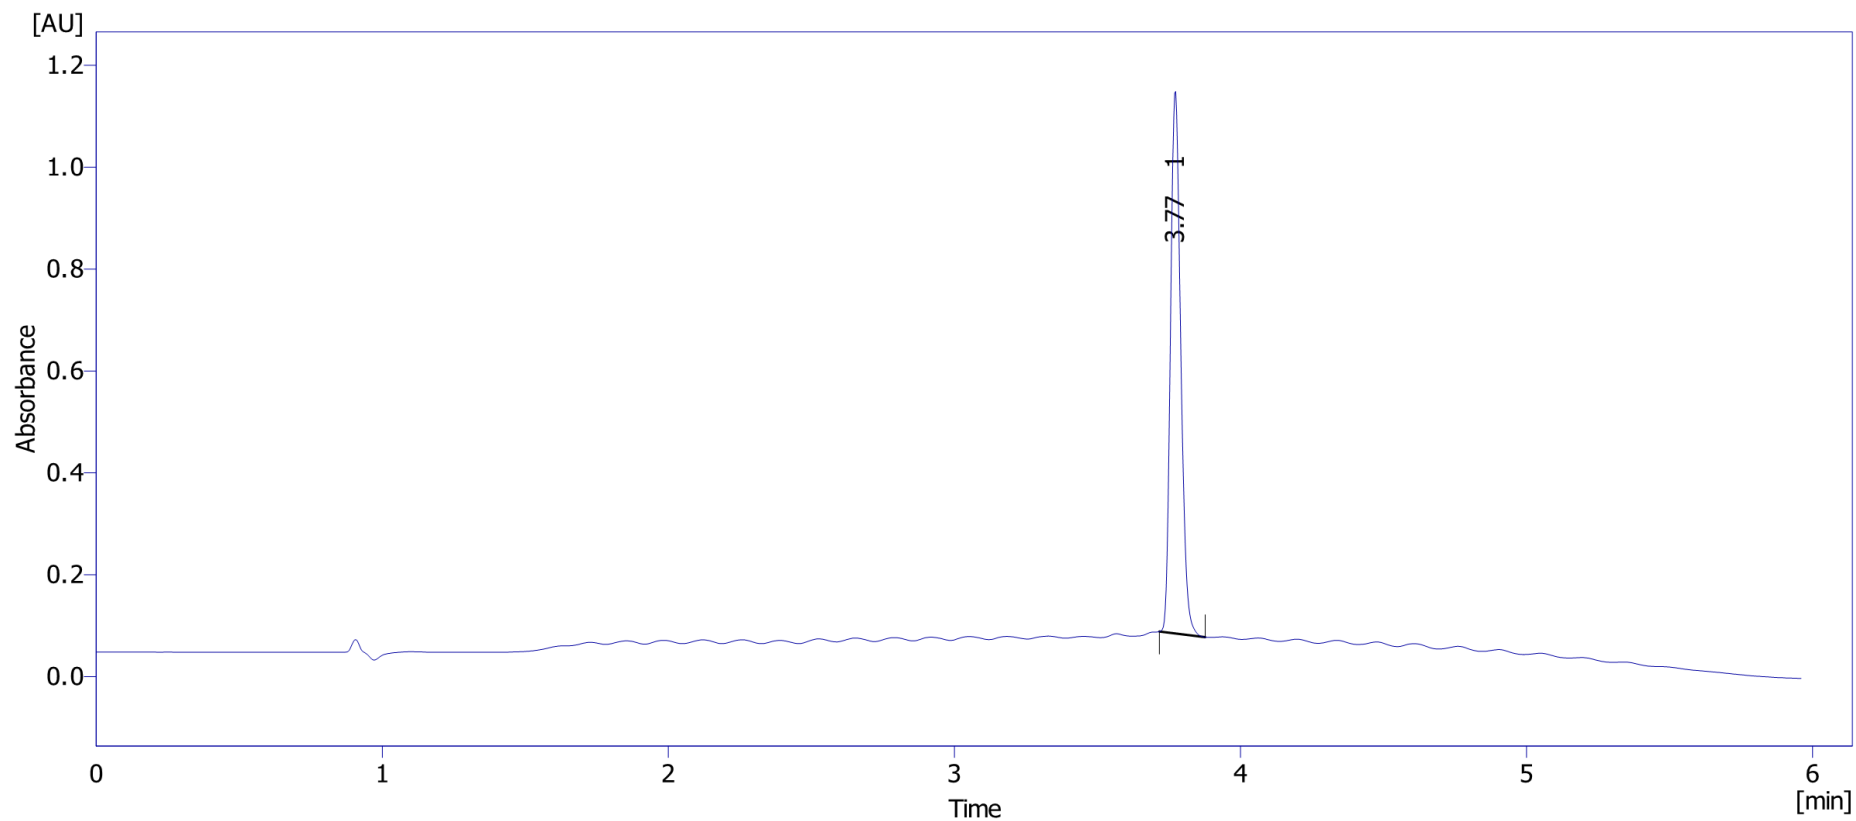

Supplementary Figure S4. *continued*

**B**

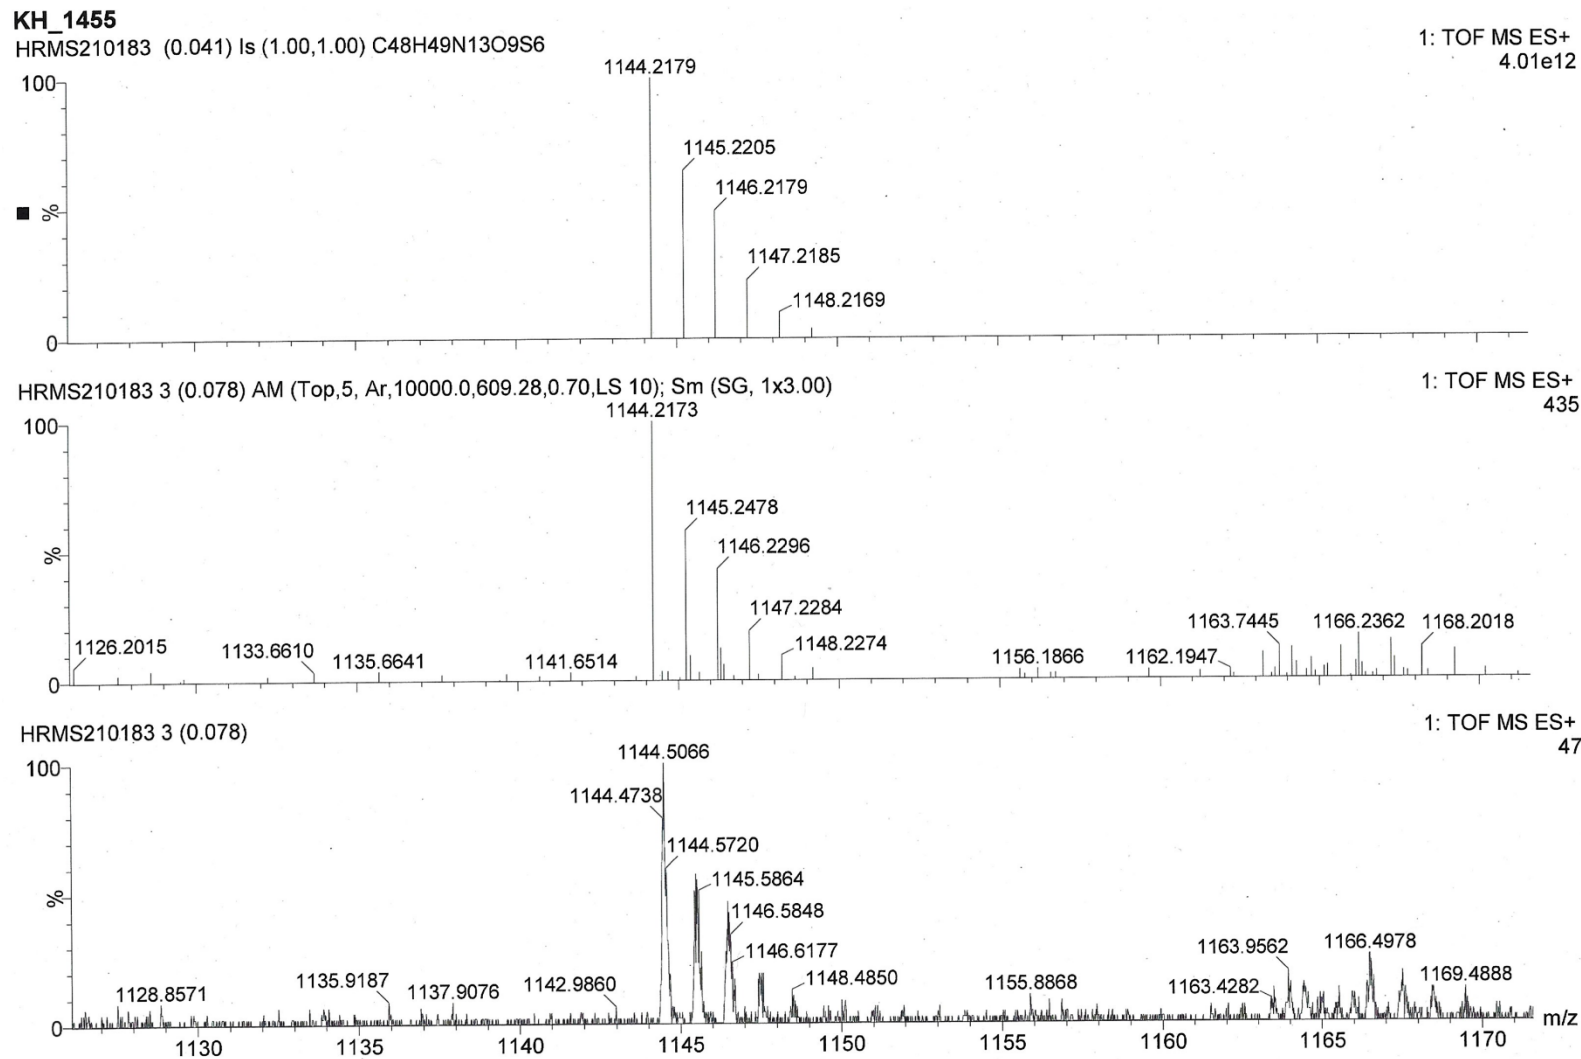

Supplementary Materials

**Supplementary Figure S5.**  $^1\text{H}$  NMR spectrum of the purified compound with the signals of micrococcin P1 indicated on top and peak integrations represented in red on the bottom. Signals related to impurities are indicated with a red frame. The sample was recorded in  $\text{DMSO-}d_6$  at a field strength of 500 MHz.

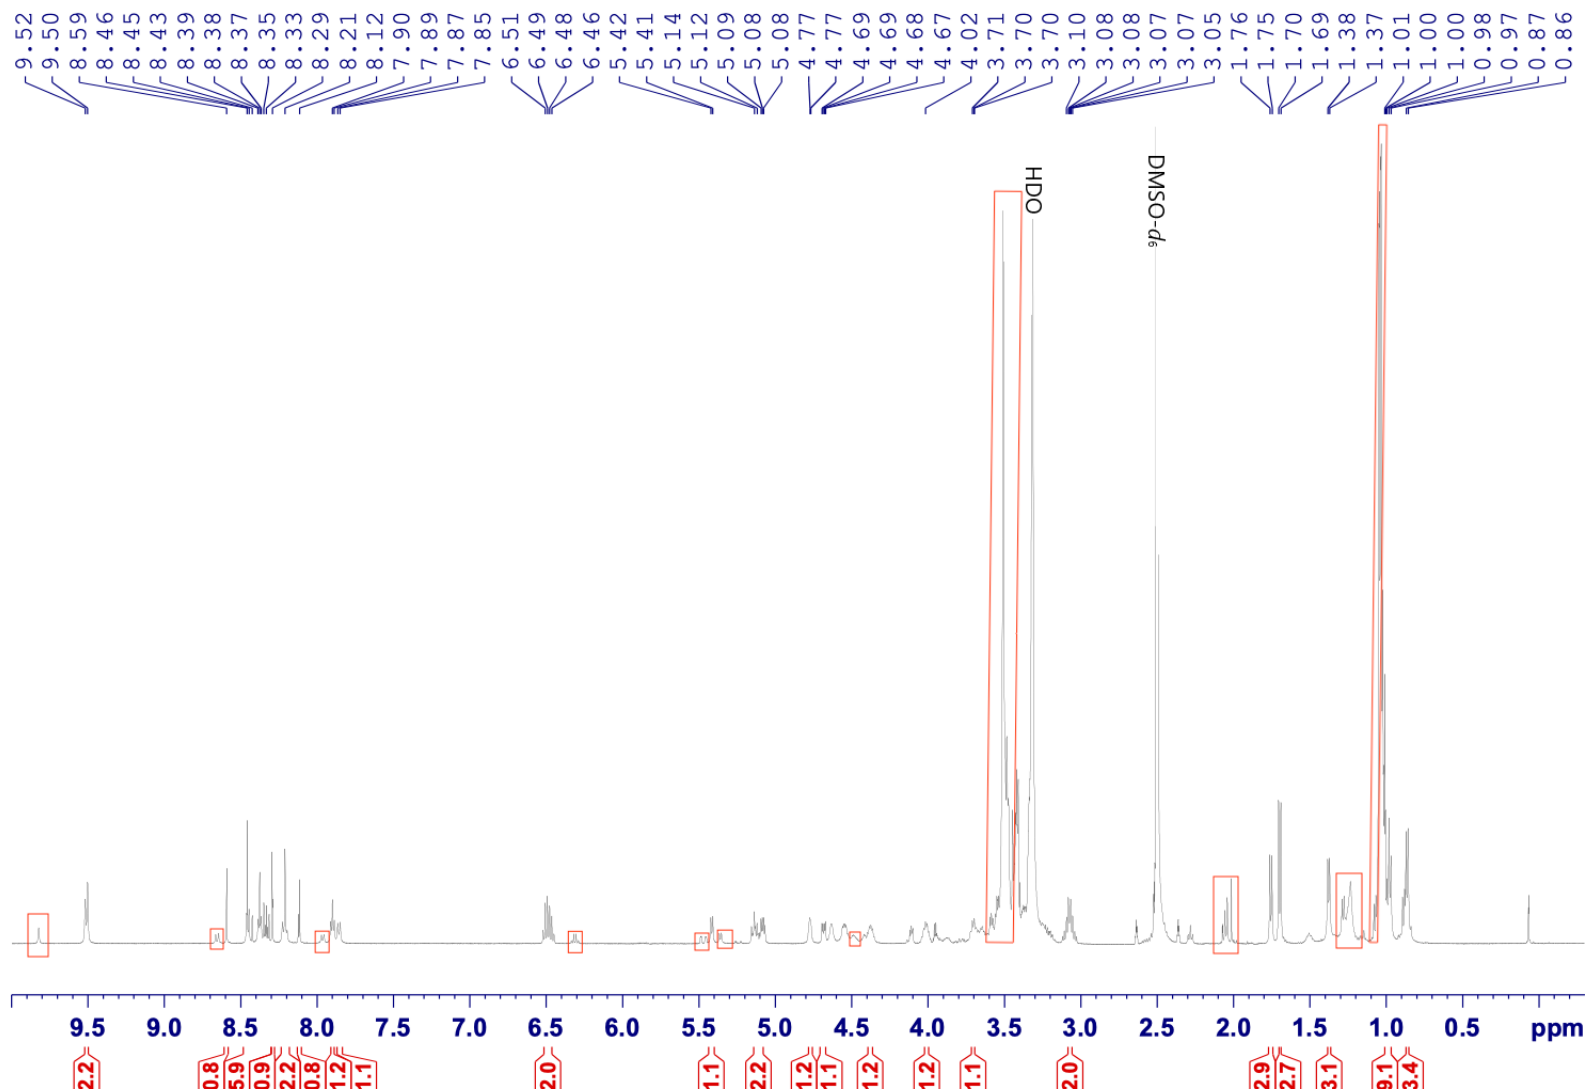

Supplementary Materials

**Supplementary Figure S6.**  $^1\text{H}$  NMR spectrum overlay of the purified compound (blue) with the commercially available micrococcin P1 (red) from Cayman Chemical with a purity of 95%. The samples were recorded in  $\text{DMSO-}d_6$  at a field strength of 500 MHz.

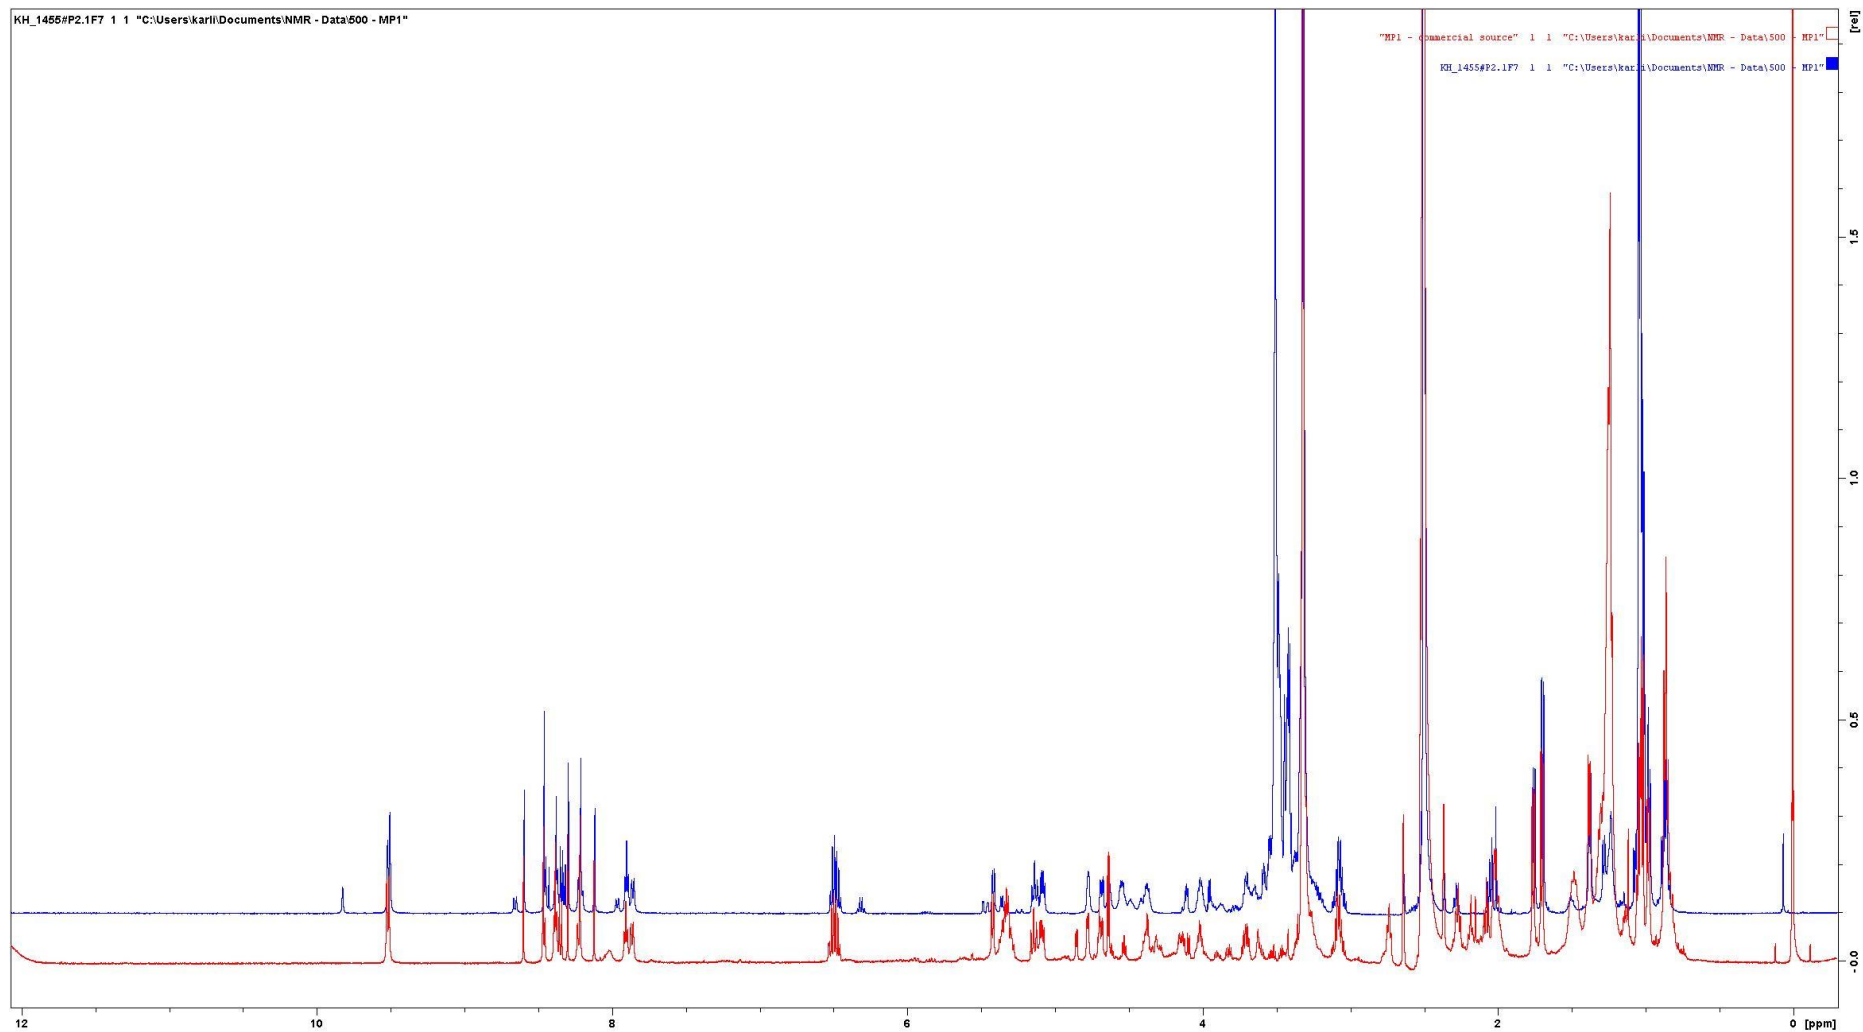

**Supplementary Figure S7.**  $^1\text{H}$ - $^1\text{H}$  COSY spectrum of the purified compound recorded in  $\text{DMSO-}d_6$  with a 500 MHz field strength.

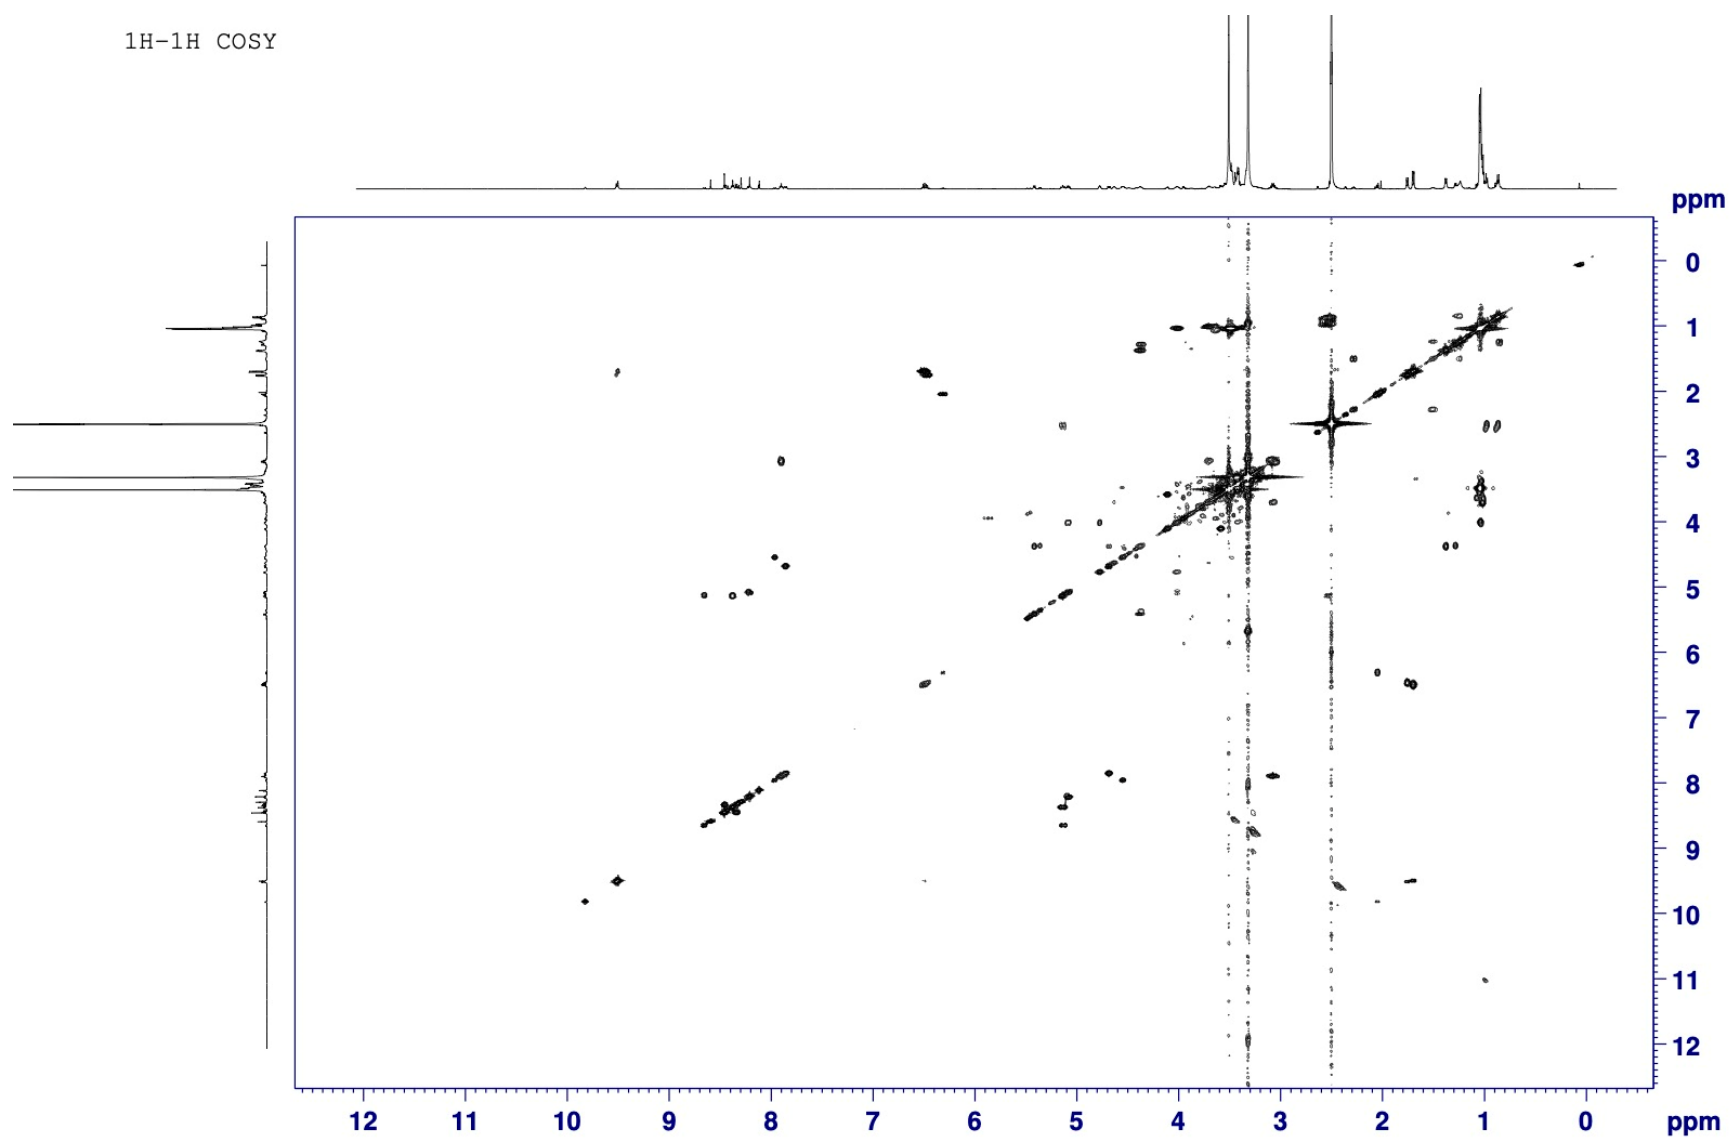

Supplementary Materials

**Supplementary Figure S8.**  $^1\text{H}$ - $^{13}\text{C}$  HSQC spectrum of the purified compound recorded in  $\text{DMSO-}d_6$  with a 500 MHz field strength.

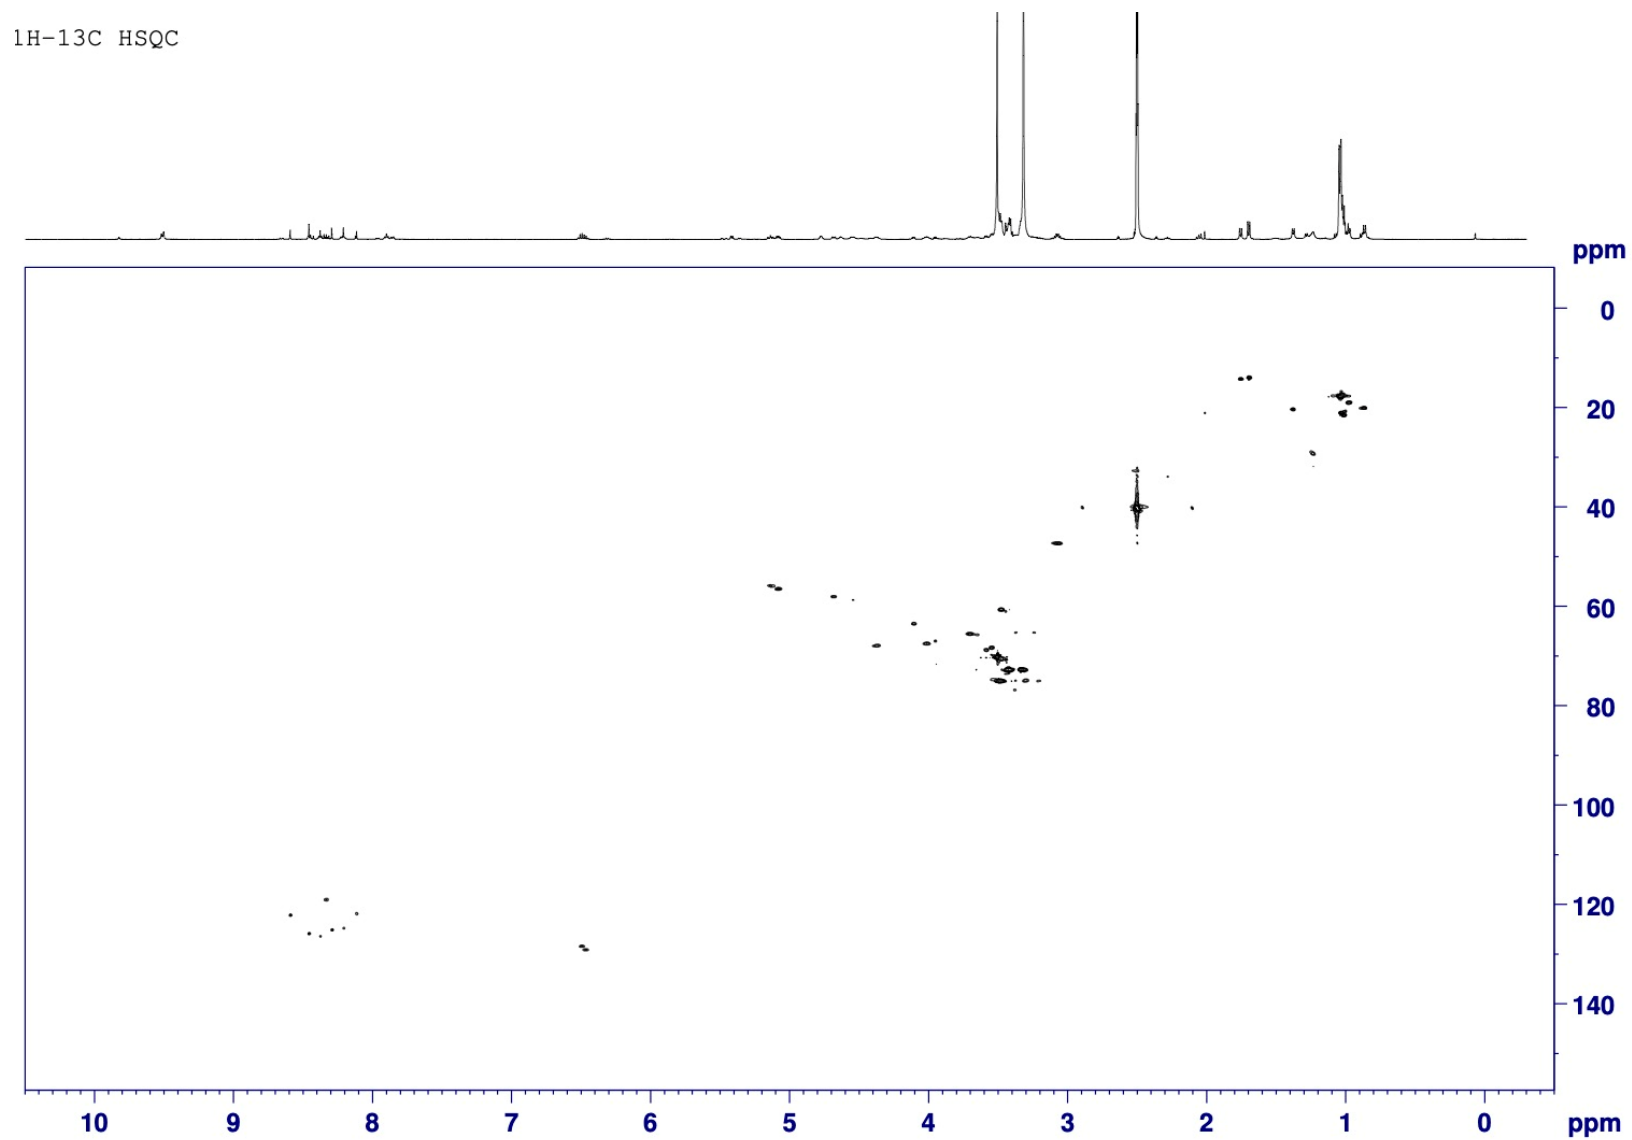

Supplementary Materials

**Supplementary Figure S9.**  $^1\text{H}$ - $^{13}\text{C}$  HMBC spectrum of the purified compound recorded in  $\text{DMSO-}d_6$  with a 500 MHz field strength.

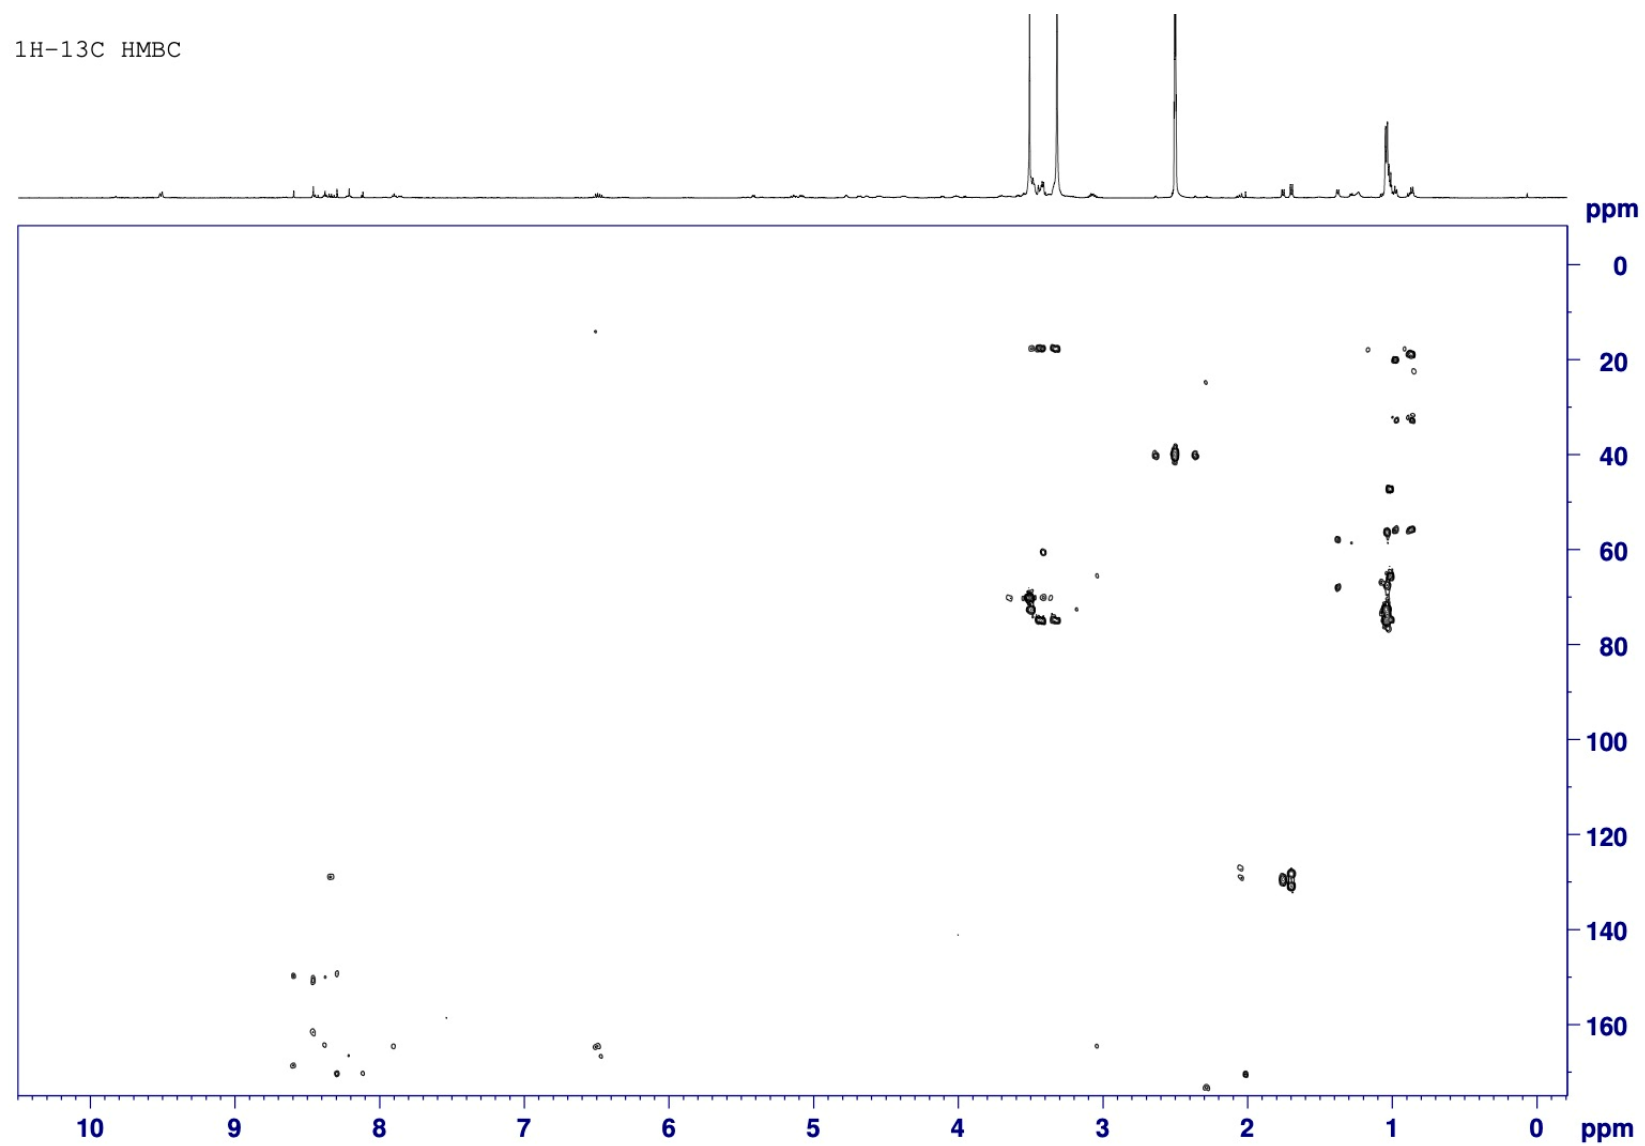

Supplement: aem.02088-21-s0001.pdf [file aem.02088-21-s0001.pdf]
